1  
2  
3  
4  
5  
6  
7  
8  
9  
10  
11  
12  
13  
14  
15  
16  
17  
18  
19  
20  
21  
22  
23  
24  
25  
26  
27  
28  
29

**A *Drosophila* model of oral peptide therapeutics for adult Intestinal Stem Cell tumors**

Anjali Bajpai<sup>1\*</sup>, Quazi Taushif Ahmad<sup>1</sup>, Hong-Wen Tang<sup>2</sup>, Nishat Manzar<sup>1</sup>, Virender Singh<sup>1,4</sup>,  
Ashwani Thakur<sup>1</sup>, Bushra Ateeq<sup>1</sup>, Norbert Perrimon<sup>2,3</sup>, Pradip Sinha<sup>1\*</sup>

<sup>1</sup>Biological Sciences and Bioengineering, Indian Institute of Technology Kanpur, Kanpur, India.

<sup>2</sup>Department of Genetics, Harvard Medical School, Boston, MA 02115, USA.

<sup>3</sup>Howard Hughes Medical Institute, Boston, MA 02115, USA.

<sup>4</sup>Department of Physiology & Biophysics, Case Western Reserve University, Cleveland, OH 44106.

\*Authors for correspondence: [anjalii@iitk.ac.in](mailto:anjalii@iitk.ac.in), [pradips@iitk.ac.in](mailto:pradips@iitk.ac.in)

*Running title:* Peptide therapy for tumor suppression in *Drosophila*

**Key words:** *Drosophila*, Peptide therapeutic, Yki, Intestinal Stem Cells, Integrin signaling

30 **ABSTRACT**

31 The proto-oncogene YAP /Yki, a transcription co-factor of the Hippo pathway, has been linked to  
32 many cancers. YAP interacts with DNA-binding TEAD/Sd proteins to regulate expression of its  
33 transcriptional targets. Disruption of YAP-TEAD therefore offers a potential therapeutic  
34 strategy. The mammalian Vestigial Like (VGLL) protein, specifically its TONDU domain, has  
35 been shown to competitively inhibit YAP-TEAD interaction and a TONDU peptide can suppress  
36 YAP-induced cancer. As TONDU could potentially be developed into a therapeutic peptide for  
37 multiple cancers, we evaluated its efficacy in Yki-driven adult Intestinal Stem Cell (ISC) tumors  
38 in *Drosophila*. We show that oral uptake of the TONDU peptide is highly effective at inhibiting  
39 Yki-driven gut tumors by suppressing YAP-TEAD interaction. Comparative proteomics of early  
40 and late stage Yki-driven ISC tumors revealed enrichment of a number of proteins, including  
41 members of the integrin signaling pathway, such as Talin, Vinculin and Paxillin. These, in turn  
42 displayed a decrease in their levels in TONDU-peptide treated tumors. Further, we show that Sd  
43 binds to the regulatory region of integrin-coding gene, *mew*, which codes for  $\alpha$ PS1, a key  
44 integrin of the ISCs. In support to a possible role of integrins in Yki-driven ISC tumors, we show  
45 that genetic downregulation of *mew* arrests Yki-driven ISC proliferation, reminiscent of the  
46 effects of TONDU peptide. Altogether, our findings present a novel platform for screening  
47 therapeutic peptides and provide insights into tumor suppression mechanisms.

48

49 **SIGNIFICANCE STATEMENT**

50 Discovering novel strategies to inhibit oncogene activity is a priority in cancer biology. As  
51 signaling pathways are widely conserved between mammals and *Drosophila*, these questions can  
52 be effectively addressed in this model organism. Here, we show that progression of *Drosophila*  
53 Intestinal Stem Cell (ISC) tumors induced by gain of an oncogenic form of the transcription co-  
54 factor Yki can be suppressed by feeding a peptide corresponding to the conserved TONDU  
55 domain of Vestigial (Vg), which blocks binding of Yki to the Sd transcription factor. Further, we  
56 show that down regulation of the integrin signaling pathway is causally linked to TONDU-  
57 peptide-mediated ISC tumor suppression. Our findings reveal that *Drosophila* can be  
58 successfully used to screen peptides for their therapeutic applications.

## 59 INTRODUCTION

60 *Drosophila* has emerged as an effective cancer model for the screening of small molecule  
61 therapeutics (1-4). Of interest, *Drosophila* adult gut tumors, such as Yki-driven intestinal stem  
62 cell (ISC) tumors (5) or a multigenic hindgut model of colon cancer (6), have been successfully  
63 used to screen for anti-proliferative small molecules. While cancer-promoting rogue kinases are  
64 amenable to inhibition by small molecules, others, such as transcription factors and co-factors,  
65 are largely considered undruggable (7, 8). In this regard, peptides are particularly attractive as  
66 therapeutic molecules (9-11) because of their high selectivity, improved tolerance and ability to  
67 target large interacting interfaces (12). While most peptide therapeutics require parenteral  
68 injection (10), their oral delivery is highly desirable and currently a number of orally derived  
69 therapeutic peptides are being tested in clinical trials (10).

70 The proto-oncogene YAP (Yes-associated protein), a transcription co-factor of the Hippo  
71 pathway, has been linked to many cancers (see review (13)). YAP interacts with DNA-binding  
72 TEAD proteins (transcriptional enhanced associate domain, TEAD1-4) to regulate expression of  
73 its transcriptional targets, and an increase in levels of TEAD proteins has been observed in a  
74 wide range of human cancers (14). YAP binds to TEAD via an unusually large interface, the  $\Omega$ -  
75 loop (12, 15) that lacks a defined binding pocket, making it an unlikely target of inhibition by  
76 small molecules. TEAD proteins also interact with other transcriptional co-factors, such as the  
77 Vestigial Like (VGLL1-4) proteins, via the conserved 26 amino acid TONDU domain present in  
78 VGLL proteins (15). Further, VGLL proteins behave as tumor suppressors in mammals due to  
79 their ability to inhibit YAP-TEAD interactions, as seen in lung (16) and breast (17) carcinomas.  
80 Interestingly, a synthetic peptide analog of the TONDU domain of VGLL4 was found to inhibit  
81 gastric cancer growth (18).

82 Yorkie (Yki), the *Drosophila* homolog of mammalian YAP, was first identified as a nuclear  
83 effector that triggers epithelial proliferation upon deregulation of Hippo signaling (19).  
84 Subsequent studies revealed its role as a developmental regulator of organ growth (20) and as an  
85 oncogene (21, 22). Like its mammalian counterpart, *Drosophila* Yki binds to a TEAD domain-  
86 containing protein, Scalloped (Sd) (23, 24), which can also bind to Vestigial (Vg) (25, 26), the  
87 *Drosophila* counterpart of mammalian VGLLs. *Drosophila* Vg protein was shown to possess the  
88 TONDU domain that mediates its interaction with Sd (27).

89 The similarities between mammalian VGLLs-TEADs-YAP and *Drosophila* Vg-Sd-Yki suggest  
90 that a TONDU peptide could suppress Yki-driven *Drosophila* tumors by competitively inhibiting  
91 the Yki-Sd interaction. Further, use of the well characterized Yki-driven ISC tumor model as a  
92 platform for peptide therapeutics also holds the promise to unravel genetic network that drives  
93 ISC tumor progression and, conversely, can be suppressed to restrain tumor growth. Further,  
94 Here, we used the adult *Drosophila* gut, where Sd-dependent Yki activity is required for ISC  
95 homeostasis (28-31), to test whether the TONDU peptide can suppress unrestricted ISC  
96 proliferation associated with expression of an activated form of Yki (32, 33). We show that adult  
97 flies displaying ISC-specific gain of activated Yki fail to display robust ISC tumors when they  
98 are raised in food supplemented with the TONDU peptide. Comparative proteome analysis of  
99 Yki-driven ISC tumors and those from flies fed with TONDU, revealed perturbations in integrin-  
100 associated proteins, suggesting that they could play a critical role in Yki-driven ISC tumors. In  
101 support of this hypothesis, downregulation of integrin  $\alpha$ PS1 inhibits Yki-driven ISC  
102 tumorigenesis. These findings reveal that *Drosophila* ISC tumor models can be used to screen for  
103 anticancer peptides and to unravel mechanisms of tumor suppression.

104

## 105 **RESULTS AND DISCUSSION**

### 106 ***Genetic suppression of Yki-driven ISC tumor growth by the TONDU peptide***

107 The *Drosophila* adult gut is made up of three cell types: differentiated enterocytes (ECs), entero-  
108 endocrine cells (EEs), and intestinal stem cells (ISCs) (Figure 1A-B, (34)). Expression of a  
109 phosphorylation-defective and therefore constitutively active form of Yki in the ISCs (*esg-Gal4*  
110 *Gal80<sup>ts</sup>>UAS-yki<sup>3SA</sup>*, referred to as *esg<sup>ts</sup>>yki<sup>3SA</sup>*) triggers ISC over-proliferation (32) (Figure 1C,  
111 Figure S1A), as revealed by increased 5-ethynyl-2 deoxyuridine (EdU) uptake (Figure S1B),  
112 Phospho-Histone H3 (PH3) staining (Figure S1C), and elevated expression of matrix  
113 metalloproteinase genes (MMPs) (Figure S1D). Further, as previously reported (32), aged  
114 *esg<sup>ts</sup>>yki<sup>3SA</sup>* flies display tumor-associated systemic wasting syndrome, which is characterized by  
115 abdominal bloating (Figure 1H), organ atrophy (Figure S1E), and elevated levels of the insulin  
116 antagonist *Impl2* (Figure 1J) (32, 35). We also observed an increase in the transcript levels of  
117 Yki targets such as *myc*, *cycE*, *diap1* and *exp* (Figure 1J) in *esg<sup>ts</sup>>yki<sup>3SA</sup>* tumors. Further, we note

118 that *esg<sup>ts</sup>>yki<sup>3SA</sup>* tumors show concomitant increase in Sd (Figure 1D, J), the DNA-binding  
119 partner of Yki.

120 To test whether the fly equivalent of the 25 amino acid long TONDU domain of Vg  
121 (CVVFTNYSGDTASQVDEHFSRALNY) can arrest neoplastic tumor progression similar to the  
122 full length protein observed earlier (21), we examined somatic clones in wing imaginal discs that  
123 lack the tumor suppressor *lethal giant larvae (lgl)* and that express an activated form of Yki  
124 (*UAS-yki<sup>S168A</sup>* (36), referred to as *lgl UAS-yki*) and the TONDU peptide. Strikingly, marked  
125 reduction in the growth of *lgl UAS-yki UAS-vg<sup>TONDU</sup>* tumors was observed as compared to their  
126 *lgl UAS-yki* counterparts (Figure S2A, B).

127 Next, we examined the effect of TONDU expression on Yki-induced ISC tumors in the adult  
128 midgut. Co-expression of TONDU and activated Yki (*esg<sup>ts</sup>>yki<sup>3SA</sup> UAS-vg<sup>TONDU</sup>*) revealed that  
129 TONDU could inhibit Yki-driven ISC proliferation throughout the midgut, an effect that was  
130 more striking in the anterior midgut (Figure 1E). Consistent with these observations, we also  
131 noted a marked reduction in the number of GFP-marked ISCs (Figure 1F), with an  
132 accompanying decrease in their proliferation, marked by EdU uptake (Figure S2C-E). In  
133 addition, TONDU-expressing *esg<sup>ts</sup>>yki<sup>3SA</sup>* flies displayed improved life span (Figure 1G) and  
134 delayed onset of tumor-associated organ wasting phenotypes (Figures 1I and S1F). Consistent  
135 with reduced abdominal bloating, TONDU-expressing tumor bearing flies displayed a decrease  
136 in hemolymph content (Figure S2F), improved muscle activity (Figure S2G) and decreased  
137 levels of *Impl2* (Figure 1J) in addition to other transcriptional targets of Yki (Figure 1J). By  
138 contrast, gain of the TONDU peptide alone in ISCs (*esg<sup>ts</sup>>vg<sup>TONDU</sup>*) failed to alter the number of  
139 ISCs (Figure S2H, I). Altogether, these results reveal that Yki-driven ISC tumors are suppressed  
140 upon co-expression of the TONDU peptide, with an accompanying delay in the onset of tumor-  
141 associated syndromes.

#### 142 ***Oral uptake of synthetic TONDU peptide inhibits Yki-driven ISC tumor***

143 Next, we tested whether a synthetic TONDU peptide could inhibit Yki-driven ISC tumors akin to  
144 endogenously expressed peptide. We fed adult flies with varying concentrations of TONDU  
145 peptide linked to an HIV-TAT motif (RKKRRQRRR) and a nuclear localizing signal (NLS)  
146 (Figure 2A) to facilitate its cellular uptake (37) and nuclear localization, respectively. This TAT-  
147 NLS-TONDU peptide is referred to as TONDU peptide in subsequent part of the text. Prior to its

*Peptide therapy for tumor suppression in Drosophila*

148 oral administration to adult flies we first confirmed cellular uptake of the fluorescent-labeled  
149 TONDU peptide in S2R<sup>+</sup> cells, as observed by its cytoplasmic and nuclear localization (Figure  
150 2B). Further, to test whether the TONDU peptide can inhibit Yki-Sd complex formation, we  
151 used the Hippo-response-element (HRE)-luciferase reporter (23), which serves as a readout for  
152 Yki-Sd transcriptional activity. Specifically, we co-transfected S2R<sup>+</sup> cells with the reporter  
153 along with Yki and Sd-expressing vectors, then treated the cells with 100 nM of TONDU  
154 peptide, and observed a moderate but consistent decrease in luciferase activity (Figure 2C). Next,  
155 to confirm binding of the synthetic TONDU peptide to Sd and subsequent inhibition of Yki-Sd  
156 interaction, we carried out co-immunoprecipitation studies using FLAG-tagged TONDU peptide  
157 in S2R<sup>+</sup> cells transfected with HA-Sd and GFP-Yki. Co-immunoprecipitation experiments  
158 revealed that the Yki-Sd interaction is indeed significantly reduced upon incubating S2R<sup>+</sup> cells  
159 with TONDU for 24 hours (Figure 2D). Finally, when purified HA-Sd from S2R<sup>+</sup> cells was  
160 incubated with FLAG-tagged TONDU peptide, TONDU displayed binding with Sd, as revealed  
161 by immunoblots using anti-Flag antibody (Figure 2E). Together, these results demonstrate that  
162 TONDU can disrupt the Sd-Yki interaction by binding to Sd.

163 We next tested whether oral uptake of TONDU peptide could inhibit *esg<sup>ts</sup>>yki<sup>3SA</sup>* tumors. To do  
164 this, *esg<sup>ts</sup>>yki<sup>3SA</sup>* flies were collected 24 hours post eclosion and fed for ten days on food  
165 supplemented with TONDU peptide at a final concentration of 50, 100 or 200  $\mu$ M. We noted a  
166 progressive reduction in tumor mass (Figure 2F-I), marked by a decrease in the number of GFP-  
167 marked ISCs (Figure 2J) with increasing concentration of TONDU peptide in the food. By  
168 contrast, the tumor load was only moderately reduced when these flies were fed with a sequence-  
169 scrambled TONDU peptide (Figure S3A) at comparable concentrations (see Figure S3B-F); this  
170 residual inhibition of ISC proliferation is presumably due to a partial retention of the secondary  
171 structures necessary for TONDU activity (15) in the scrambled-TONDU peptide (Figure S3G).  
172 Further, to confirm cellular uptake of TONDU peptide by the gut epithelia, we fed FLAG-tagged  
173 TONDU peptide (at final concentration of 200  $\mu$ M) to *esg<sup>ts</sup>>yki<sup>3SA</sup>* flies, and detected its cellular  
174 uptake in gut lysates followed by immunoblotting using the anti-FLAG antibody (Figure S3H).  
175 In parallel, we also noted that feeding TONDU (at 200  $\mu$ M) did not affect the numbers of ISCs in  
176 control (*esg<sup>ts</sup>>GFP*) guts (Figure S3I). In addition, two cell lines derived from human tumors  
177 with elevated *YAPI* levels (Figure S3J), PC3 (prostate cancer cells) and COLO-320 (colorectal  
178 cancer cells), displayed growth arrest upon uptake of TONDU peptide (Figure 2K), whereas a

179 cell line with negligible levels of *YAPI* (Figure S3J), LNCaP, did not (Figure 2K). Altogether,  
180 these results suggest that TONDU is therapeutically relevant in a number of YAP-driven tumors  
181 irrespective of their tissues of origin.

### 182 ***Yki-driven tumor proteome reveals enrichment in integrin pathway***

183 We reasoned that proteins that are significantly perturbed in *esg<sup>ts</sup>>yki<sup>3SA</sup>* tumors and restored to  
184 normal levels following TONDU feeding may represent critical Yki-Sd targets that are critical to  
185 ISC tumorigenesis, and, therefore, could be therapeutically relevant. Thus, we carried out a  
186 proteome analysis using unlabeled LC-MS/MS of *esg<sup>ts</sup>>yki<sup>3SA</sup>* tumors on day 1 and day 7 of  
187 tumor induction, with or without TONDU peptide supplementation of the food. Altogether, we  
188 identified 1219 proteins (including isoforms), corresponding to 2771 unique Uniprot IDs at an  
189 FDR cutoff of  $q < 0.05$  (Figure 3A, Table S1). We next compared the proteomes of *esg<sup>ts</sup>>yki<sup>3SA</sup>*  
190 tumors on day 7 versus day 1 of tumor induction, and prioritized those proteins which displayed  
191 at least  $\log_2 \pm 2$  fold change (at a  $p$  value  $< 0.05$ ) for further analysis. Fold change was derived  
192 from the abundance measure of peptides (for a given protein) in day 7 versus day 1 of  
193 *esg<sup>ts</sup>>yki<sup>3SA</sup>* tumors (See SI methods) and a list was generated of 127 differentially detected  
194 proteins (corresponding to 144 unique Uniprot IDs, including isoforms) that matched to 55  
195 unique genes (Figure 3B and Table S2). For 45 of the 55 genes, the gene products showed a  
196  $> \log_2 2$  fold increase while 10 displayed  $< \log_2 2$  fold decrease in their protein levels in day 7  
197 *esg<sup>ts</sup>>yki<sup>3SA</sup>* tumors (Figure 3B and Table S2).

198 To determine whether these enriched proteins in the ISC tumors have a significant biological  
199 association we performed a protein-protein interaction (PPI)-network analysis using STRING  
200 (38), which revealed significant ( $p < 0.001$ ) interaction among some of the enriched proteins  
201 (Figure 3C). We note that the enriched gene-set include the secreted Wingless (Wg) transporter  
202 Swim (39) and known members of the Hippo protein-protein interaction network (40), including  
203 the junction proteins Coracle, Jar, and Misshapen (Table S3). Furthermore, comparison of the  
204 *esg<sup>ts</sup>>yki<sup>3SA</sup>* day 7 proteome with the recently published transcriptome (33) of *esg<sup>ts</sup>>yki<sup>3SA</sup>* tumors  
205 of comparable age revealed a close correlation between changes in proteins and their respective  
206 transcript levels ( $r = 0.548$ ) (Figure S4A).

207 Next, to look for signaling pathways that were perturbed in Yki-driven ISC tumors, we  
208 undertook a gene ontology (GO) classification of the genes enriched in  $esg^{ts}>yki^{3SA}$  tumors. GO  
209 classification revealed perturbations in several signaling pathways and protein classes (Figure  
210 3D, Table S4). In particular, we observed an increase in protein levels of key members of the  
211 integrin signaling pathway, including Talin (2.39 log<sub>2</sub>fold), Talin-interacting adaptor proteins,  
212 Vinculin (2.4 fold), and Paxillin (6.05 fold). Other members, such as  $\alpha$ PS3 and integrin-linked  
213 kinases, also displayed about a 2-fold change, albeit at  $p>0.05$  (Table S5). Consistent with these  
214 findings, a concomitant increase in the transcript levels of these proteins was observed in the  
215  $esg^{ts}>yki^{3SA}$  transcriptome (33) (Table S5). Further, many integrin pathway components,  
216 including integrins  $\alpha$ PS1,  $\alpha$ PS2,  $\alpha$ PS3 and  $\beta$ PS as well as integrin-binding ligands LamaA and  
217 LamB (33), which were not detected in our proteomic study, were also found to be  
218 transcriptionally upregulated in the RNA-Seq data (Table S5). Proteome comparison between  
219 day 7 and day 1  $esg^{ts}>yki^{3SA}$  tumors also displayed significant increase in protein levels of  
220 polarity proteins such as tight junction protein, Ferritin, Fit1, and the apical protein Shot (Figure  
221 3B), which are known to be regulated by integrin signaling (41). We note that enrichment of  
222 integrin pathway members and associated proteins, as revealed in the tumor proteome, could be  
223 of functional relevance in Yki-driven ISC tumorigenesis, since many integrin pathway members  
224 are reported to be enriched in ISCs (42), and play an essential role in ISC survival (42) and  
225 maintenance of epithelial polarity in the gut (41).

226  
227 To further determine whether the genes enriched in  $esg^{ts}>yki^{3SA}$  tumors could be Yki-Sd  
228 transcriptional targets, we searched for putative Yki-Sd binding sites in their upstream regulatory  
229 region. Chromatin binding studies have previously revealed genome-wide binding of Yki (43,  
230 44) and Sd (44) upstream of many of their transcriptional targets. We noted that ~51% (23 of 45)  
231 of the genes enriched in  $esg^{ts}>yki^{3SA}$  tumors displayed putative Sd and Yki binding sites in their  
232 upstream regulatory regions based on earlier binding studies (44) (Table S6). Interestingly,  
233 several key members of the integrin pathway, including *mew*, which codes for integrin  $\alpha$ PS1, the  
234 adaptor proteins *vinculin* and *paxilin*, and *integrin-linked kinase*, displayed Sd binding (44)  
235 (Figure 3E, Table S6), suggesting their possible transcriptional regulation by the Yki-Sd  
236 complex. We therefore examined the binding of Sd to the upstream regulatory region of *mew*, as  
237 its protein product is the most abundant integrin in the ISCs (42), and performed chromatin



*Peptide therapy for tumor suppression in Drosophila*

238 immuno-precipitation using anti-FLAG antibody on gut lysate of *esg<sup>ts</sup>>yki<sup>3SA</sup>* flies fed on FLAG-  
239 tagged TONDU peptide. qPCR was done to determine the abundance of the putative genomic  
240 binding sites in the pull-down fraction. We observed 47.04% (SD=2.3) enrichment of a putative  
241 Yki-Sd binding site in the FLAG-enabled pull-down fraction in the TONDU peptide fed flies  
242 (Figure 3F), compared to 19.8% (SD=3.0) enrichment in gut lysate from flies raised on control  
243 food, suggesting that *mew* transcription is most likely regulated by Sd in the ISCs.

244

245 We next compared the gut proteomes of *esg<sup>ts</sup>>yki<sup>3SA</sup>* flies fed on TONDU peptide-supplemented  
246 food and those displaying co-expression of the TONDU peptide (*esg<sup>ts</sup>>yki<sup>3SA</sup> UAS-vg<sup>TONDU</sup>*), to  
247 *esg<sup>ts</sup>>yki<sup>3SA</sup>* flies of comparable age (day 7) raised on normal food (Figure 2G, H). In particular,  
248 we examined the status of proteins in TONDU-peptide-treated proteome that were  $\pm > \log_2 2$  fold  
249 perturbed in untreated tumors (Figure 3B and Table S2). We observed an overall decrease in the  
250 protein levels of perturbed genes in peptide-fed tumors (Figure 3G), which coincided with a  
251 decrease in protein levels of genes involved in generic cellular processes such as RNA  
252 processing. Proteins encoded by genes such as *Pre-RNA processing factor 19 (Prp19)* (-2.16  
253 fold) (45) and *rumpelstiltskin (rump)* (-3.15 fold) were notably downregulated. Further, proteins  
254 enriched in the tumors at day 7 were mostly down-regulated upon peptide treatment (Figure 2H,  
255 Table S7). These included many members of the integrin pathway, such as Paxillin (-1.9 fold),  
256 Vinculin (-1.3 fold) and Talin (-1.2 fold). In addition, we also observed a decrease (-2.3 fold) in  
257 mitochondrial trifunctional protein  $\beta$  (Mtp- $\beta$ ), which catalyzes oxidation of long chain fatty acids  
258 (46), a possible energy source for tumors (47). We also note a decrease in peptide-treated tumors  
259 in proteins such as Chromosome bows (Chb) (-2.16 fold) that are involved in mitotic spindle  
260 assembly (48), an effect that could contribute to the observed decrease in cell proliferation of the  
261 ISC (Figure 2G-I). Altogether, these analyses reveal that TONDU peptide-treated ISC tumors  
262 display down regulation of integrin signaling components additional to those that are recruited  
263 for cellular processes such as RNA regulation (45), energy homeostasis (46) and mitosis (48)  
264 (Table S7).

265

266 ***Genetic suppression of integrin signaling phenocopies TONDU-mediated suppression of Yki-***  
267 ***driven ISC tumors***

*Peptide therapy for tumor suppression in Drosophila*

268 Integrins form an essential component of the *Drosophila* gut epithelia, including the basally  
269 located ISCs (41, 42) (Figure 4A, B). Consistent with the enrichment of integrin pathway  
270 members in *esg<sup>ts</sup>>yki<sup>3SA</sup>* proteome, we observed an overall increase in membrane localization of  
271 integrin  $\alpha$ PS1 (Figure 4A) and Talin (Figure 4B) in *esg<sup>ts</sup>>yki<sup>3SA</sup>* tumors. This observation,  
272 together with our findings that Yki-Sd bind upstream of *mew* and that suppression of integrin  
273 pathway members in peptide fed tumors, suggests that integrin down-regulation may mediate the  
274 effect of TONDU peptide inhibition of *esg<sup>ts</sup>>yki<sup>3SA</sup>* tumors. Therefore, to test whether integrin(s)  
275 are critical for Yki-driven ISC proliferation, we down-regulated *mew* in ISCs (*esg<sup>ts</sup>>yki<sup>3SA</sup>UAS-*  
276 *mew-RNAi*). Strikingly, downregulation of *mew* resulted in a marked reduction in ISC  
277 proliferation (Figure 4F, G), which was more significant in the anterior midgut than in the  
278 posterior midgut. Examination of early (day 3) *esg<sup>ts</sup>>yki<sup>3SA</sup>UAS-mew-RNAi* guts revealed poor  
279 growth of ISC tumors; in particular, most of the ISCs were seen in small clusters and made up of  
280 3 to 4 cells (Figure 4H). Further, activation of integrin alone, using a constitutively active form  
281 of the  $\beta$ PS integrin (49) in the ISCs (*esg<sup>ts</sup>>torso<sup>D/ $\beta$ Cyt</sup>*), failed to trigger ISC proliferation (Figure  
282 S5), indicating that activation of the Integrin pathway is not sufficient to drive tumorigenesis in  
283 ISCs. These observations suggest that while gain of integrin signaling alone *per se* does not  
284 transform ISCs, it is an obligatory partner for progression of Yki-driven ISC tumors.

285  
286 Our observation that Yki-driven tumors could be inhibited by down-regulating integrins offers  
287 interesting therapeutic possibilities. For instance, membrane-localized integrins could be readily  
288 accessible drug targets, compared to nuclear localized YAP. Cross-species conservation of  
289 integrin signaling pathways (50) and their critical role in cancers of diverse genetic and tissue  
290 origins (13, 50) therefore presents a compelling case for integrin pathway as an alternate  
291 therapeutic target for YAP/Yki-driven cancers (51, 52). Interestingly, integrin heterodimers have  
292 been targeted either by monoclonal antibodies, such as efatucizumab and volvociximab, or by  
293 peptides such as cilengitide (53), which have proved to be effective and are currently in clinical  
294 trials. A potential caveat with this approach however is that integrin signaling is also required for  
295 wild-type ISC proliferation (41). Possibly, ISC tumors may be more sensitive to downregulation  
296 of Integrin signaling than wild type ISC, which may offer a therapeutic window for inhibitors of  
297 Integrin signaling in YAP/Yki-driven cancers.

298

299 **Concluding remarks**

300 Advantages of low off-target activity of peptide therapy (12) are often undermined by their short  
301 half-life, poor bioavailability and uncertainties about cellular uptake. Nonetheless, targeting  
302 cellular proteins holds promise (54), as was shown earlier using the TONDU peptide (18). Our  
303 recapitulation of TONDU peptide-mediated cancer suppression (18) in ISC tumors therefore  
304 demonstrates, for the first time, that *Drosophila* could be used to screen for peptide therapeutics.  
305 Indeed, the power of genetic tractability of *Drosophila*, which permits generation of multiple  
306 versions of tumors of a given cell type using distinct cooperative signaling partners or  
307 transcription factors, including those seen perturbed in cancers in human (4, 6, 21, 55-57), would  
308 make such a platform versatile on several counts: scalability, genetic tractability and rapid  
309 elucidation of the mechanistic underpinning of peptide-based tumor suppression.

310

311 **MATERIALS AND METHODS**

312 Fly stocks were obtained from the Bloomington Drosophila Stock Center. Antibodies were  
313 obtained from the Developmental Studies Hybridoma Bank or received as gifts from other  
314 investigators. Detailed materials and methods are provided in Supplementary Methods.

315

316 **ACKNOWLEDGEMENTS**

317 We thank Jose F. de Celis for the antibody against Sd, Duoqia Pan for HRE-Luciferase reporter  
318 vectors, Nick Brown for the UAS-*torso*<sup>D/βCyt</sup> fly line, and Stephanie Mohr for comments on the  
319 manuscript. We also acknowledge proteomics service by Valerian Chem, Gurgaon, India. This  
320 study was supported by the Wellcome Trust-DBT India Alliance-Early Career Fellowship  
321 (IA/E/13/1/501271) to AB.

322

323 **REFERENCE**

- 324 1. Vidal M, Wells S, Ryan A, & Cagan R (2005) ZD6474 suppresses oncogenic RET  
325 isoforms in a *Drosophila* model for type 2 multiple endocrine neoplasia syndromes and  
326 papillary thyroid carcinoma. *Cancer Res* 65(9):3538-3541 .  
327 2. Dar AC, Das TK, Shokat KM, & Cagan RL (2012) Chemical genetic discovery of targets  
328 and anti-targets for cancer polypharmacology. *Nature* 486(7401):80-84 .

- 329 3. Willoughby LF, *et al.* (2013) An in vivo large-scale chemical screening platform using  
330 *Drosophila* for anti-cancer drug discovery. *Dis Model Mech* 6(2):521-529 .
- 331 4. Levine BD & Cagan RL (2016) *Drosophila* Lung Cancer Models Identify Trametinib  
332 plus Statin as Candidate Therapeutic. *Cell Rep* 14(6):1477-1487 .
- 333 5. Markstein M, *et al.* (2014) Systematic screen of chemotherapeutics in *Drosophila* stem  
334 cell tumors. *Proc Natl Acad Sci U S A* 111(12):4530-4535 .
- 335 6. Bangi E, Murgia C, Teague AG, Sansom OJ, & Cagan RL (2016) Functional exploration  
336 of colorectal cancer genomes using *Drosophila*. *Nat Commun* 7:13615 .
- 337 7. Darnell JE, Jr. (2002) Transcription factors as targets for cancer therapy. *Nat Rev Cancer*  
338 2(10):740-749 .
- 339 8. Lambert M, Jambon S, Depauw S, & David-Cordonnier MH (2018) Targeting  
340 Transcription Factors for Cancer Treatment. *Molecules* 23(6) .
- 341 9. Lau JL & Dunn MK (2018) Therapeutic peptides: Historical perspectives, current  
342 development trends, and future directions. *Bioorg Med Chem* 26(10):2700-2707 .
- 343 10. Drucker DJ (2019) Advances in oral peptide therapeutics. *Nat Rev Drug Discov* .
- 344 11. Ley K, Rivera-Nieves J, Sandborn WJ, & Shattil S (2016) Integrin-based therapeutics:  
345 biological basis, clinical use and new drugs. *Nat Rev Drug Discov* 15(3):173-183 .
- 346 12. Furet P, *et al.* (2019) Structure-based design of potent linear peptide inhibitors of the  
347 YAP-TEAD protein-protein interaction derived from the YAP omega-loop sequence.  
348 *Bioorg Med Chem Lett* 29(16):2316-2319 .
- 349 13. Zanconato F, Cordenonsi M, & Piccolo S (2019) YAP and TAZ: a signalling hub of the  
350 tumour microenvironment. *Nat Rev Cancer* 19(8):454-464 .
- 351 14. Huh HD, Kim DH, Jeong HS, & Park HW (2019) Regulation of TEAD Transcription  
352 Factors in Cancer Biology. *Cells* 8(6) .
- 353 15. Pobbati AV, Chan SW, Lee I, Song H, & Hong W (2012) Structural and functional  
354 similarity between the Vgll1-TEAD and the YAP-TEAD complexes. *Structure*  
355 20(7):1135-1140 .
- 356 16. Zhang W, *et al.* (2014) VGLL4 functions as a new tumor suppressor in lung cancer by  
357 negatively regulating the YAP-TEAD transcriptional complex. *Cell Res* 24(3):331-343 .
- 358 17. Zhang Y, *et al.* (2017) VGLL4 Selectively Represses YAP-Dependent Gene Induction  
359 and Tumorigenic Phenotypes in Breast Cancer. *Sci Rep* 7(1):6190 .
- 360 18. Jiao S, *et al.* (2014) A peptide mimicking VGLL4 function acts as a YAP antagonist  
361 therapy against gastric cancer. *Cancer Cell* 25(2):166-180 .
- 362 19. Huang J, Wu S, Barrera J, Matthews K, & Pan D (2005) The Hippo signaling pathway  
363 coordinately regulates cell proliferation and apoptosis by inactivating Yorkie, the  
364 *Drosophila* Homolog of YAP. *Cell* 122(3):421-434 .
- 365 20. Cho E, *et al.* (2006) Delineation of a Fat tumor suppressor pathway. *Nat Genet*  
366 38(10):1142-1150.
- 367 21. Khan SJ, *et al.* (2013) Epithelial neoplasia in *Drosophila* entails switch to primitive cell  
368 states. *Proc Natl Acad Sci U S A* 110(24):E2163-2172 .
- 369 22. Menendez J, Perez-Garijo A, Calleja M, & Morata G (2010) A tumor-suppressing  
370 mechanism in *Drosophila* involving cell competition and the Hippo pathway. *Proc Natl*  
371 *Acad Sci U S A* 107(33):14651-14656 .
- 372 23. Wu S, Liu Y, Zheng Y, Dong J, & Pan D (2008) The TEAD/TEF family protein  
373 Scalloped mediates transcriptional output of the Hippo growth-regulatory pathway. *Dev*  
374 *Cell* 14(3):388-398 .

- 375 24. Zhang L, *et al.* (2008) The TEAD/TEF family of transcription factor Scalloped mediates  
376 Hippo signaling in organ size control. *Dev Cell* 14(3):377-387 .
- 377 25. Halder G, *et al.* (1998) The Vestigial and Scalloped proteins act together to directly  
378 regulate wing-specific gene expression in *Drosophila*. *Genes Dev* 12(24):3900-3909 .
- 379 26. Simmonds AJ, *et al.* (1998) Molecular interactions between Vestigial and Scalloped  
380 promote wing formation in *Drosophila*. *Genes Dev* 12(24):3815-3820 .
- 381 27. Vaudin P, Delanoue R, Davidson I, Silber J, & Zider A (1999) TONDU (TDU), a novel  
382 human protein related to the product of vestigial (vg) gene of *Drosophila melanogaster*  
383 interacts with vertebrate TEF factors and substitutes for Vg function in wing formation.  
384 *Development* 126(21):4807-4816 .
- 385 28. Karpowicz P, Perez J, & Perrimon N (2010) The Hippo tumor suppressor pathway  
386 regulates intestinal stem cell regeneration. *Development* 137(24):4135-4145 .
- 387 29. Staley BK & Irvine KD (2010) Warts and Yorkie mediate intestinal regeneration by  
388 influencing stem cell proliferation. *Curr Biol* 20(17):1580-1587 .
- 389 30. Ren F, *et al.* (2010) Hippo signaling regulates *Drosophila* intestine stem cell proliferation  
390 through multiple pathways. *Proc Natl Acad Sci U S A* 107(49):21064-21069 .
- 391 31. Jin Y, *et al.* (2013) Brahma is essential for *Drosophila* intestinal stem cell proliferation  
392 and regulated by Hippo signaling. *Elife* 2:e00999 .
- 393 32. Kwon Y, *et al.* (2015) Systemic organ wasting induced by localized expression of the  
394 secreted insulin/IGF antagonist ImpL2. *Dev Cell* 33(1):36-46 .
- 395 33. Song W, *et al.* (2019) Tumor-Derived Ligands Trigger Tumor Growth and Host Wasting  
396 via Differential MEK Activation. *Dev Cell* 48(2):277-286 e276 .
- 397 34. Guo Z, Lucchetta E, Rafel N, & Ohlstein B (2016) Maintenance of the adult *Drosophila*  
398 intestine: all roads lead to homeostasis. *Curr Opin Genet Dev* 40:81-86 .
- 399 35. Figueroa-Claevega A & Bilder D (2015) Malignant *Drosophila* tumors interrupt insulin  
400 signaling to induce cachexia-like wasting. *Dev Cell* 33(1):47-55 .
- 401 36. Oh H & Irvine KD (2008) In vivo regulation of Yorkie phosphorylation and localization.  
402 *Development* 135(6):1081-1088 .
- 403 37. Wadia JS & Dowdy SF (2005) Transmembrane delivery of protein and peptide drugs by  
404 TAT-mediated transduction in the treatment of cancer. *Adv Drug Deliv Rev* 57(4):579-  
405 596 .
- 406 38. Szklarczyk D, *et al.* (2019) STRING v11: protein-protein association networks with  
407 increased coverage, supporting functional discovery in genome-wide experimental  
408 datasets. *Nucleic Acids Res* 47(D1):D607-D613 .
- 409 39. Mulligan KA, *et al.* (2012) Secreted Wingless-interacting molecule (Swim) promotes  
410 long-range signaling by maintaining Wingless solubility. *Proc Natl Acad Sci U S A*  
411 109(2):370-377 .
- 412 40. Kwon Y, *et al.* (2013) The Hippo signaling pathway interactome. *Science* 342(6159):737-  
413 740 .
- 414 41. Chen J, Sayadian AC, Lowe N, Lovegrove HE, & St Johnston D (2018) An alternative  
415 mode of epithelial polarity in the *Drosophila* midgut. *PLoS Biol* 16(10):e3000041 .
- 416 42. Lin G, *et al.* (2013) Integrin signaling is required for maintenance and proliferation of  
417 intestinal stem cells in *Drosophila*. *Dev Biol* 377(1):177-187 .
- 418 43. Oh H, *et al.* (2013) Genome-wide association of Yorkie with chromatin and chromatin-  
419 remodeling complexes. *Cell Rep* 3(2):309-318 .

- 420 44. Nagaraj R, *et al.* (2012) Control of mitochondrial structure and function by the  
421 Yorkie/YAP oncogenic pathway. *Genes Dev* 26(18):2027-2037 .
- 422 45. Guilgur LG, *et al.* (2014) Requirement for highly efficient pre-mRNA splicing during  
423 *Drosophila* early embryonic development. *Elife* 3:e02181 .
- 424 46. Biswas S, Lunec J, & Bartlett K (2012) Non-glucose metabolism in cancer cells--is it all  
425 in the fat? *Cancer Metastasis Rev* 31(3-4):689-698 .
- 426 47. Koundouros N & Poulogiannis G (2020) Reprogramming of fatty acid metabolism in  
427 cancer. *Br J Cancer* 122(1):4-22 .
- 428 48. Reis R, *et al.* (2009) Dynein and mast/orbit/CLASP have antagonistic roles in regulating  
429 kinetochore-microtubule plus-end dynamics. *J Cell Sci* 122(Pt 14):2543-2553 .
- 430 49. Martin-Bermudo MD, Alvarez-Garcia I, & Brown NH (1999) Migration of the  
431 *Drosophila* primordial midgut cells requires coordination of diverse PS integrin  
432 functions. *Development* 126(22):5161-5169 .
- 433 50. Cooper J & Giancotti FG (2019) Integrin Signaling in Cancer: Mechanotransduction,  
434 Stemness, Epithelial Plasticity, and Therapeutic Resistance. *Cancer Cell* 35(3):347-367 .
- 435 51. Arun AS, Tepper CG, & Lam KS (2018) Identification of integrin drug targets for 17  
436 solid tumor types. *Oncotarget* 9(53):30146-30162 .
- 437 52. Arosio D, Manzoni L, Corno C, & Perego P (2017) Integrin-Targeted Peptide- and  
438 Peptidomimetic-Drug Conjugates for the Treatment of Tumors. *Recent Pat Anticancer*  
439 *Drug Discov* 12(2):148-168 .
- 440 53. Raab-Westphal S, Marshall JF, & Goodman SL (2017) Integrins as Therapeutic Targets:  
441 Successes and Cancers. *Cancers (Basel)* 9(9) .
- 442 54. Chang YS, *et al.* (2013) Stapled alpha-helical peptide drug development: a potent dual  
443 inhibitor of MDM2 and MDMX for p53-dependent cancer therapy. *Proc Natl Acad Sci U*  
444 *SA* 110(36):E3445-3454 .
- 445 55. Gupta RP, Bajpai A, & Sinha P (2017) Selector genes display tumor cooperation and  
446 inhibition in *Drosophila* epithelium in a developmental context-dependent manner.  
447 *Biology open* 6(11):1581-1591 .
- 448 56. Bajpai A & Sinha P (2019) Hh signaling from de novo organizers drive lgl neoplasia in  
449 *Drosophila* epithelium. *Dev Biol* .
- 450 57. Das TK & Cagan RL (2017) KIF5B-RET Oncoprotein Signals through a Multi-kinase  
451 Signaling Hub. *Cell Rep* 20(10):2368-2383 .
- 452 58. Mi H, Guo N, Kejariwal A, & Thomas PD (2007) PANTHER version 6: protein  
453 sequence and function evolution data with expanded representation of biological  
454 pathways. *Nucleic Acids Res* 35(Database issue):D247-252 .

455

## 456 FIGURE LEGENDS

457 **Figure 1. Expression of the TONDU peptide inhibits Yki-driven ISC tumors.** (A) Schematic  
458 representation depicting the different cell types in the adult *Drosophila* gut. (B, B') *esg<sup>ts</sup>>UAS-*  
459 *GFP* labels ISCs in the *Drosophila* midgut. (B) ISCs (marked by GFP) are interspersed  
460 throughout the gut. Overlying muscles are marked with F-Actin (red). (B') x-z section displaying  
461 basally located ISCs (GFP). (C) *esg<sup>ts</sup>>yki<sup>3SA</sup>UAS-GFP* gut shows an increase in ISC numbers.

*Peptide therapy for tumor suppression in Drosophila*

462 (D) *esg<sup>ts</sup>>yki<sup>3SA</sup>UAS-GFP* tumors show increase in Sd level. (E) Decrease in ISC (marked by  
463 GFP) in the anterior and posterior midgut of *esg<sup>ts</sup>>yki<sup>3SA</sup> UAS-vg<sup>TONDU</sup>* flies that coexpress  
464 TONDU peptide. (F) Quantification of GFP in TONDU-expressing and non-expressing  
465 *esg<sup>ts</sup>>yki<sup>3SA</sup>* guts. (G) Increase in survival of *esg<sup>ts</sup>>yki<sup>3SA</sup>UAS-vg<sup>TONDU</sup> UAS-GFP* flies (n=50)  
466 compared to *esg<sup>ts</sup>>yki<sup>3SA</sup> UAS-GFP* flies. (H) Abdominal bloating in *esg<sup>ts</sup>>yki<sup>3SA</sup>UAS-GFP* flies  
467 as seen on day 6 after tumor induction (n=19/25 are bloated). (I) *esg<sup>ts</sup>>yki<sup>3SA</sup> UAS-vg<sup>TONDU</sup>UAS-*  
468 *GFP* flies display delay in bloating (n=14/25 are not bloated). (J) qPCR displaying the decrease  
469 in mRNA levels of candidate genes in TONDU-expressing flies. Data presented as mean ±SE.  
470 Scale bars 100 μm in all, except B' and D: 50 μm, and H and I: 1mm.

471 **Figure 2. Synthetic TONDU peptide inhibits Yki-driven ISC tumors.** (A) Representation of  
472 the synthetic TONDU peptide. (B-B') Nuclear localization of fluorescent-tagged (red) TONDU  
473 peptide in S2R+ cells. (B') Magnified view of the boxed area in B. TONDU-Peptide (red) in the  
474 nucleus (yellow arrow) and cytoplasm (blue arrow). (C) Decrease in HRE-Luciferase reporter  
475 activity in S2R+ cells when treated with TONDU peptide. (D-E) Immuno-blots showing  
476 competitive binding of TONDU peptide to Yki-Sd complex (D). (E) Binding of TONDU peptide  
477 to Sd. (F-I) Guts from *esg<sup>ts</sup>>yki<sup>3SA</sup>* flies fed on TONDU peptide. (F) Unfed (control), (G) 50 μM  
478 (n=10), (H) 100 μM (n=12) and (I) 200 μM (n=10). (J) Quantification of GFP in TONDU  
479 peptide-fed and -unfed *esg<sup>ts</sup>>yki<sup>3SA</sup>* flies. (K) Viability of cancer cells on treatment with TONDU  
480 peptide, as estimated using the Resazurin cell viability assay. Scale bars: 10μm in B; 100 μm in  
481 F-I.

482 **Figure 3. Comparative proteomic analysis of Yki-driven ISC tumors and tumors inhibited**  
483 **by the TONDU peptide:** (A) Heat map displaying changes in protein levels in day 7 and day 1  
484 of *esg<sup>ts</sup>>yki<sup>3SA</sup>* tumors. (B) 55 differentially (>±2 log<sub>2</sub>fold, p=0.05) expressed proteins in day 7  
485 *esg<sup>ts</sup>>yki<sup>3SA</sup>* tumors. (C) Protein-protein interaction (PPI) network of enriched proteins (>log<sub>2</sub> 2  
486 fold) in *esg<sup>ts</sup>>yki<sup>3SA</sup>* tumors generated with STRING (38) representing 55 nodes and 63 edges  
487 (PPI enrichment p<0.0001). (D) Different Gene Ontology classes identified by PANTHER (58)  
488 in differentially expressed proteins between *esg<sup>ts</sup>>yki<sup>3SA</sup>-day7 versus -day 1* tumor proteome. (E)  
489 Sd and Yki binding sites in the regulatory regions of select integrin pathway members as  
490 determined in (44). (F) Percent enrichment for Sd-binding upstream of *mew* (αPS1) inferred by  
491 ChIP with anti-FLAG antibody. (G) Heatmap displaying the effect of TONDU peptide on

492 *esg<sup>ts</sup>>yki<sup>3SA</sup>* tumor proteome. (H) Heat map displaying change in levels of protein ( $>\pm 2$  fold in  
493 day 7 tumors) upon TONDU peptide treatment.

494 **Figure 4. Loss of Integrin signaling inhibits growth of Yki-driven ISC tumors.** (A-B)  $\alpha$ PS1  
495 (Mew, A) and Talin (B) staining in *esg<sup>ts</sup>>UAS-GFP* marked ISCs. (C-D) Overall increase in  
496  $\alpha$ PS1 (C) and Talin (D) in *esg<sup>ts</sup>>yki<sup>3SA</sup>* tumors. (E-F) Inhibition of Yki-driven tumors upon  
497 simultaneous down-regulation of  $\alpha$ PS1 (*esg<sup>ts</sup>>yki<sup>3SA</sup>UAS-mew-RNAi*, n=9, F), when compared to  
498 similarly aged *esg<sup>ts</sup>>yki<sup>3SA</sup>* tumors (E). (G) Quantification of GFP from E and F. (H) Early  
499 *esg<sup>ts</sup>>yki<sup>3SA</sup>UAS-mew-RNAi* tumors (day 3) display small ISC clusters. (I) Schematic of Yki-Sd  
500 mediated transcription in wild type guts (A); -in Yki tumor (B); and in -Yki tumors in the  
501 presence of the TONDU peptide (C). Scale bars 100  $\mu$ m.

502

503

#### 504 SUPPLEMENTARY FIGURE LEGENDS

505 **Figure S1. ISCs with gain of Yki display tumor phenotypes.** (A-D) *esg<sup>ts</sup>>yki<sup>3SA</sup>UAS-GFP*  
506 tumors. Proliferating ISCs expressing the stem cell marker Delta (A) display an increase EdU  
507 uptake (B), increase in Phospho-Histone (C), and increase in MMP levels (D). (E) Atrophy of  
508 ovaries in *esg<sup>ts</sup>>yki<sup>3SA</sup>* flies (n=21/25). (F) Improved morphology of ovaries in *esg<sup>ts</sup>>yki<sup>3SA</sup>UAS-*  
509 *vg<sup>TONDU</sup>* flies (n=12/25). Scale bars 100  $\mu$ m.

510 **Figure S2. Expression of the TONDU peptide inhibits Yki-driven epithelial tumors.** (A-B)  
511 Wing imaginal discs mosaic for *lgl<sup>Δ</sup>* mutant clones that express activated Yki (referred to as *lgl<sup>Δ</sup>*  
512 *UAS-yki*) display tumors phenotype (A). (B) Tumor growth inhibited upon co-expression of the  
513 TONDU peptide (*lgl<sup>Δ</sup>UAS-ykiFRT40A;UAS-vg<sup>TONDU</sup>*). (C-E) Decrease in the number of  
514 proliferating cells detected by EdU (red) staining in *esg<sup>ts</sup>>yki<sup>3SA</sup>UAS-vg<sup>TONDU</sup>* (D), compared to  
515 *esg<sup>ts</sup>>yki<sup>3SA</sup>* tumors (C). (E) Quantification of EdU fluorescence in C and D. (F) Decrease in  
516 hemolymph content (n=25) in *esg<sup>ts</sup>>yki<sup>3SA</sup>UAS-vg<sup>TONDU</sup>* flies compared to *esg<sup>ts</sup>>yki<sup>3SA</sup>* flies on  
517 Day 7. (G) TONDU-expressing *esg<sup>ts</sup>>yki<sup>3SA</sup>* flies (n=35) suppress the loss of climbing activity  
518 seen in *esg<sup>ts</sup>>yki<sup>3SA</sup>* flies. (H-I) Expression of TONDU peptide in ISCs (*esg<sup>ts</sup>>UAS-vg<sup>TONDU</sup>*)  
519 does not affect ISC numbers. Scale bars 100  $\mu$ m.



520 **Figure S3. TONDU-peptide mediated inhibition of Yki-driven ISC tumors.** (A) Schematic  
521 representation of the scrambled-TONDU peptide. (B-D) The scrambled-TONDU peptide  
522 displays poor growth inhibition of  $esg^{ts}>yki^{3SA}$  tumors (compare with Figure 2H and I). (E) Box  
523 plot depicting GFP quantification in  $esg^{ts}>yki^{3SA}$  tumors from flies fed on scrambled TONDU  
524 peptide. (F) Histogram displaying decrease in mean-GFP of  $esg^{ts}>yki^{3SA}UAS-GFP$  tumors from  
525 flies fed with TONDU peptide or with scrambled-TONDU peptide, when compared to unfed  
526 controls. Note that the decrease is significantly more in TONDU peptide as compared to  
527 scrambled peptide fed tumors. (G) Secondary structures of the TONDU (left) and Scrambled-  
528 TONDU (right) as predicted by JPred (<http://www.compbio.dundee.ac.uk/jpred/>). (H) Dot blot  
529 for FLAG-tagged TONDU peptide using anti-FLAG antibody, on native peptide (different serial  
530 dilutions); and in cell lysate (right panel) from guts (n=25) of flies fed on 200  $\mu$ M of FLAG-  
531 tagged TONDU peptide and unfed flies used as control. (I) Control ( $esg^{ts}>UAS-GFP$ ) flies fed  
532 on 200  $\mu$ M of TONDU peptide do not display changes in ISC numbers. (J) mRNA levels of  
533 *YAP1* in different human cancer cell lines as determined by qPCR. Scale bars 100  $\mu$ m.

534 **Figure S4. Comparison of  $esg^{ts}>yki^{3SA}$  proteome and transcriptome.** x-y correlation plot  
535 displaying Z-score comparison of  $\log_2$  fold change of genes in the proteome (current study) and  
536 transcriptome (33) of  $esg^{ts}>yki^{3SA}$  tumors.

537 **Figure S5. Gain of integrin signaling in *Drosophila* ISCs.** Constitutive gain of integrin  
538 signaling in  $esg^{ts}>UAS-torso^{D/\beta Cyt}$  as seen on day 4 of Gal4 activation. No aberrant proliferation  
539 of ISCs was observed. Scale bars 100  $\mu$ m.

540

FIGURE 1

bioRxiv preprint doi: <https://doi.org/10.1101/2020.01.21.913806>; this version posted January 22, 2020. The copyright holder for this preprint (which was not certified by peer review) is the author/funder. All rights reserved. No reuse allowed without permission.

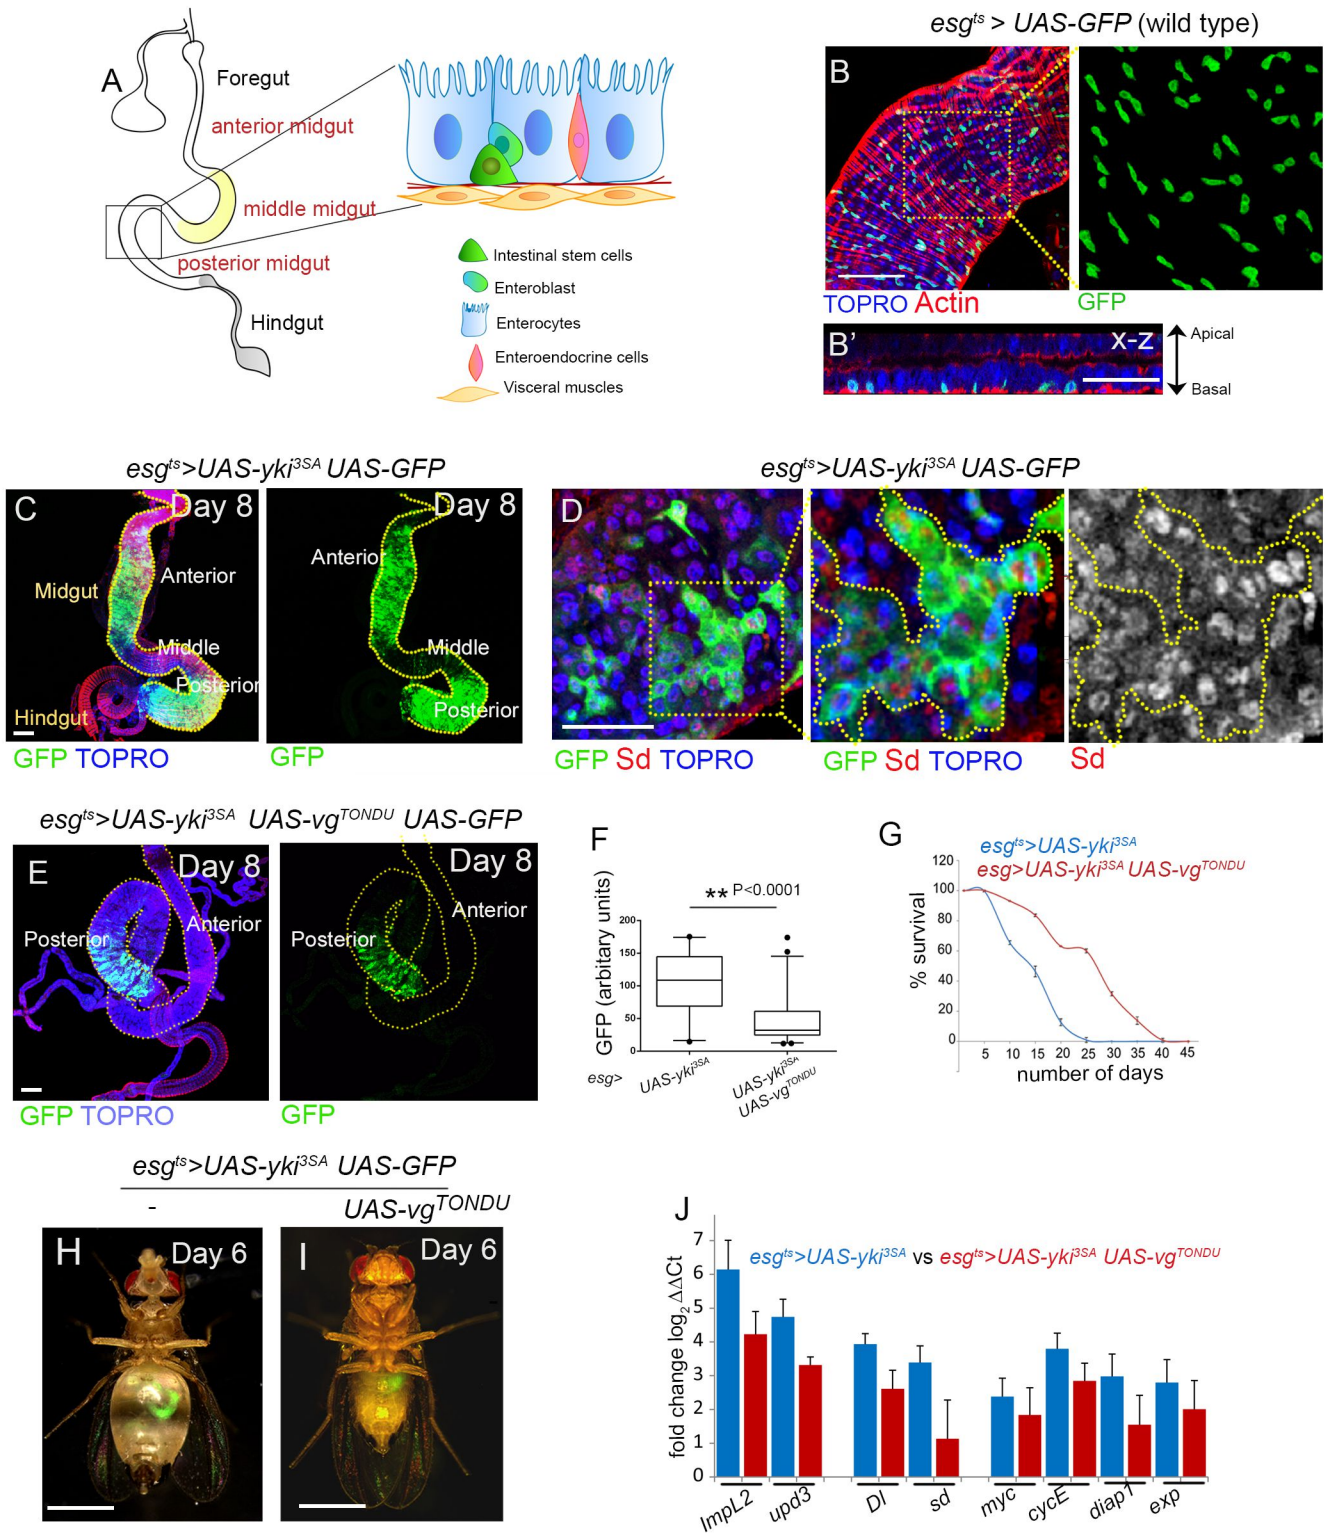

## FIGURE 2

bioRxiv preprint doi: <https://doi.org/10.1101/2020.01.21.913806>; this version posted January 22, 2020. The copyright holder for this preprint (which was not certified by peer review) is the author/funder. All rights reserved. No reuse allowed without permission.

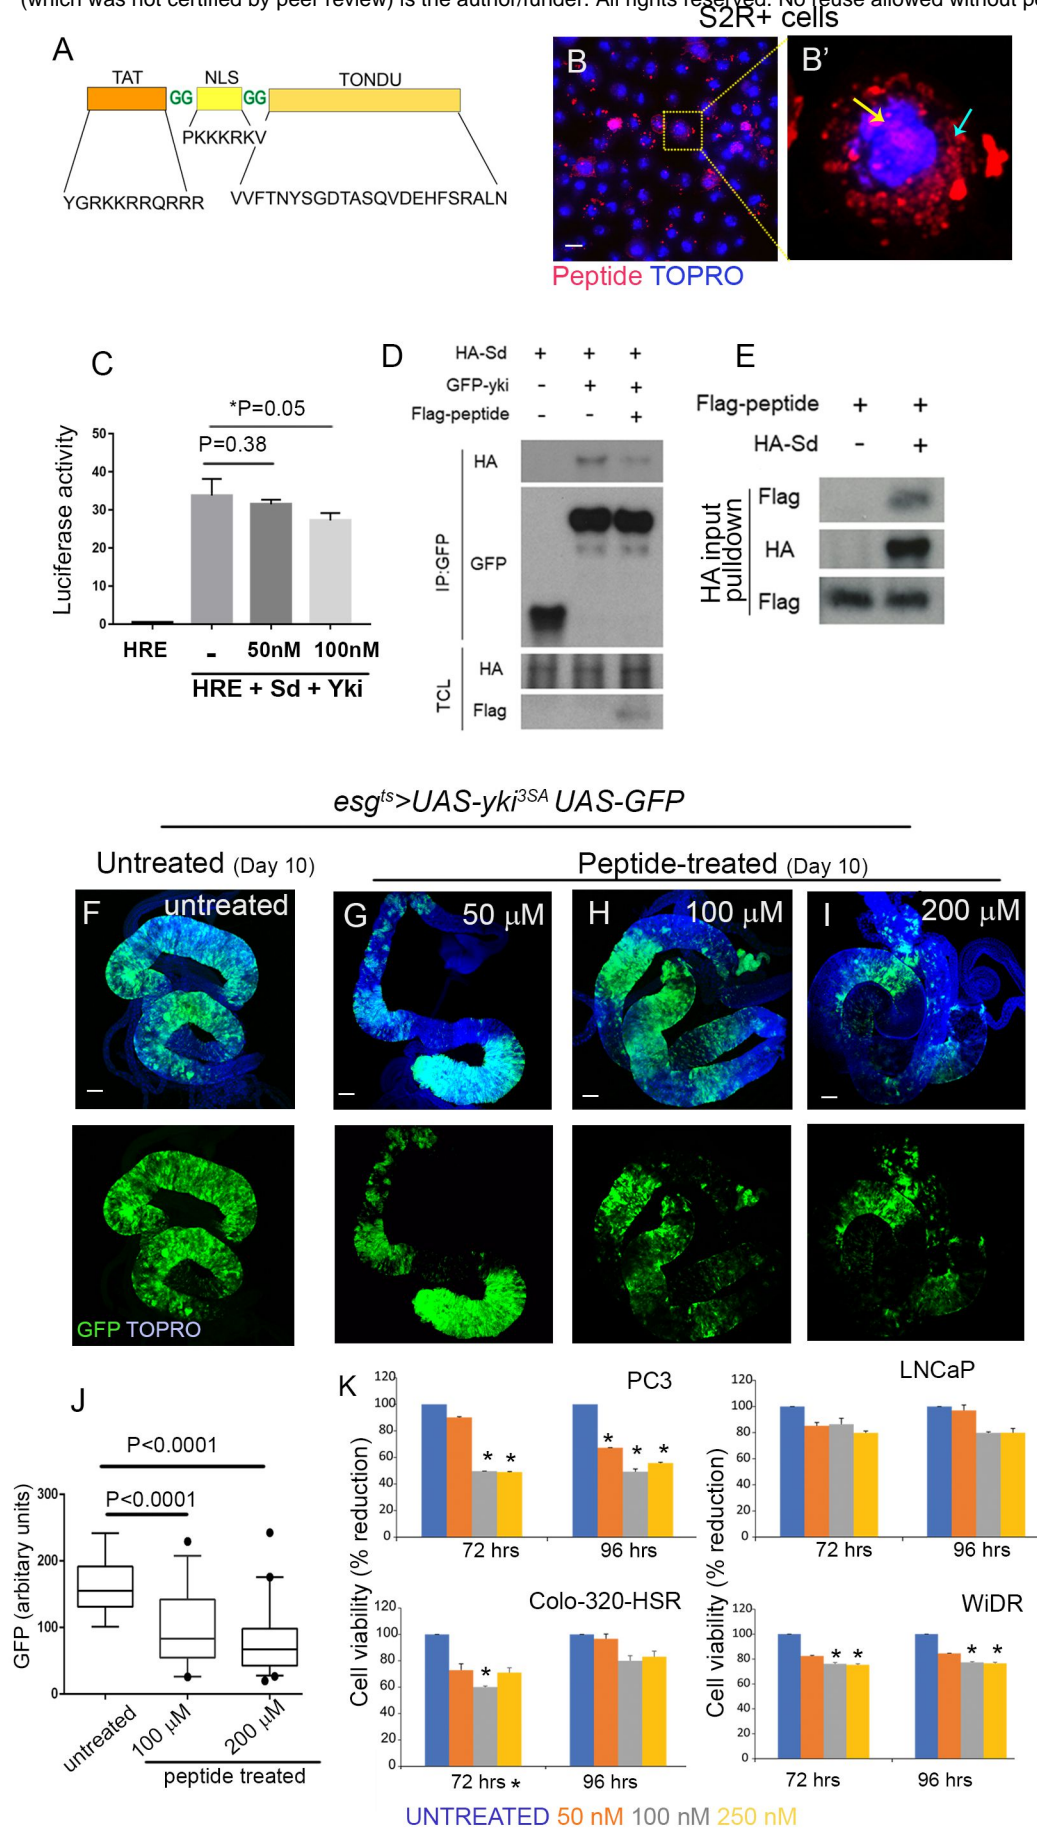

# Figure 3

bioRxiv preprint doi: <https://doi.org/10.1101/2020.01.21.913806>; this version posted January 22, 2020. The copyright holder for this preprint (which was not certified by peer review) is the author/funder. All rights reserved. No reuse allowed without permission.

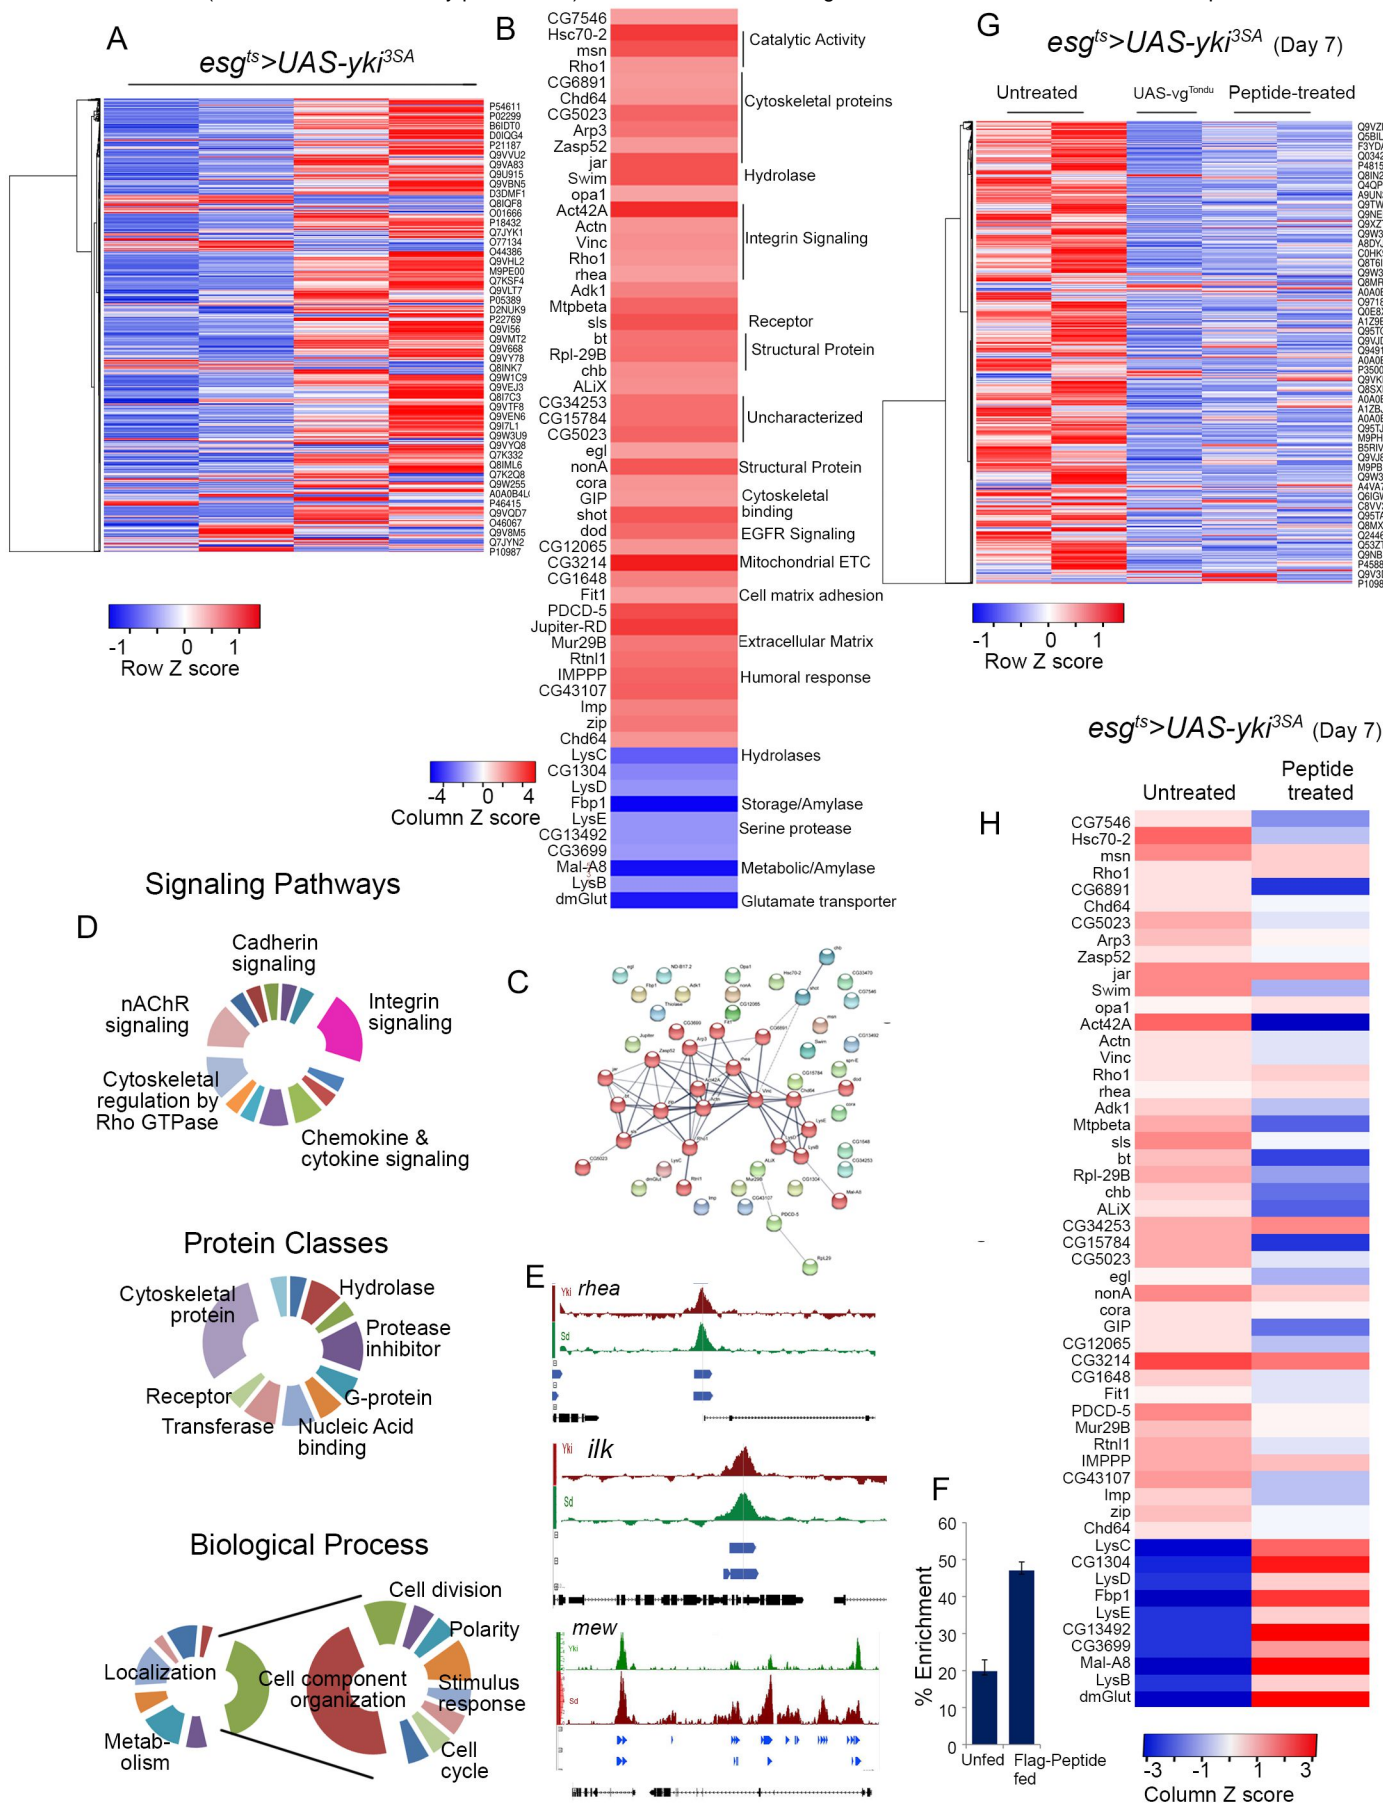

FIGURE 4

bioRxiv preprint doi: <https://doi.org/10.1101/2020.01.21.913806>; this version posted January 22, 2020. The copyright holder for this preprint (which was not certified by peer review) is the author/funder. All rights reserved. No reuse allowed without permission.

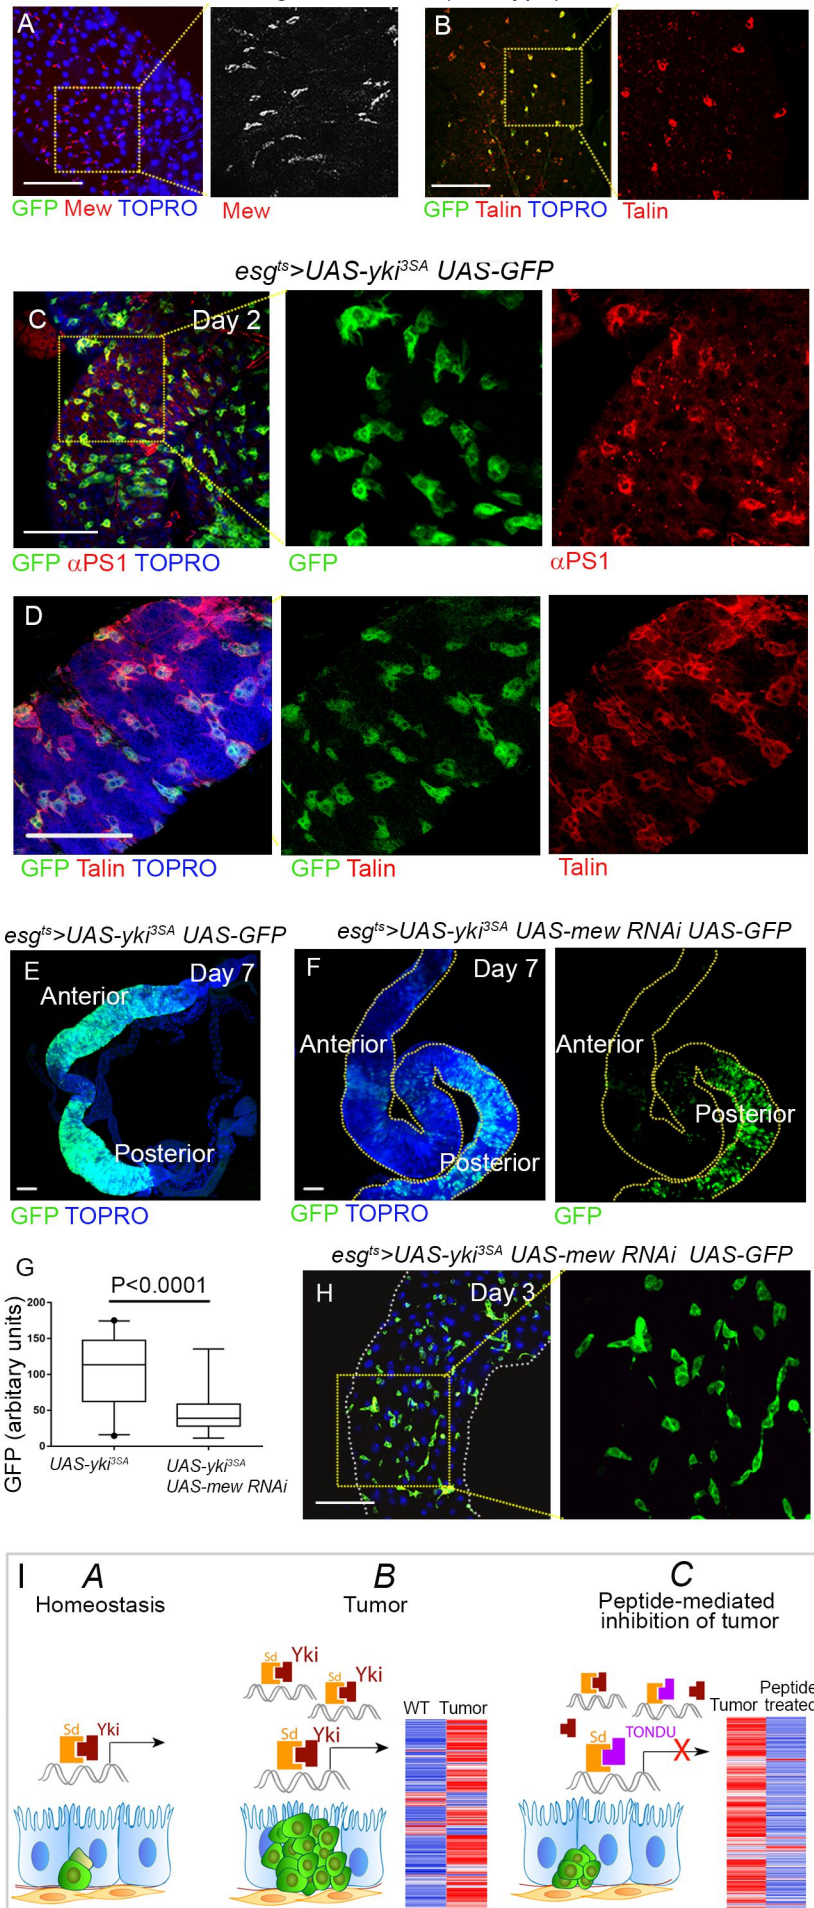

FIGURE S1

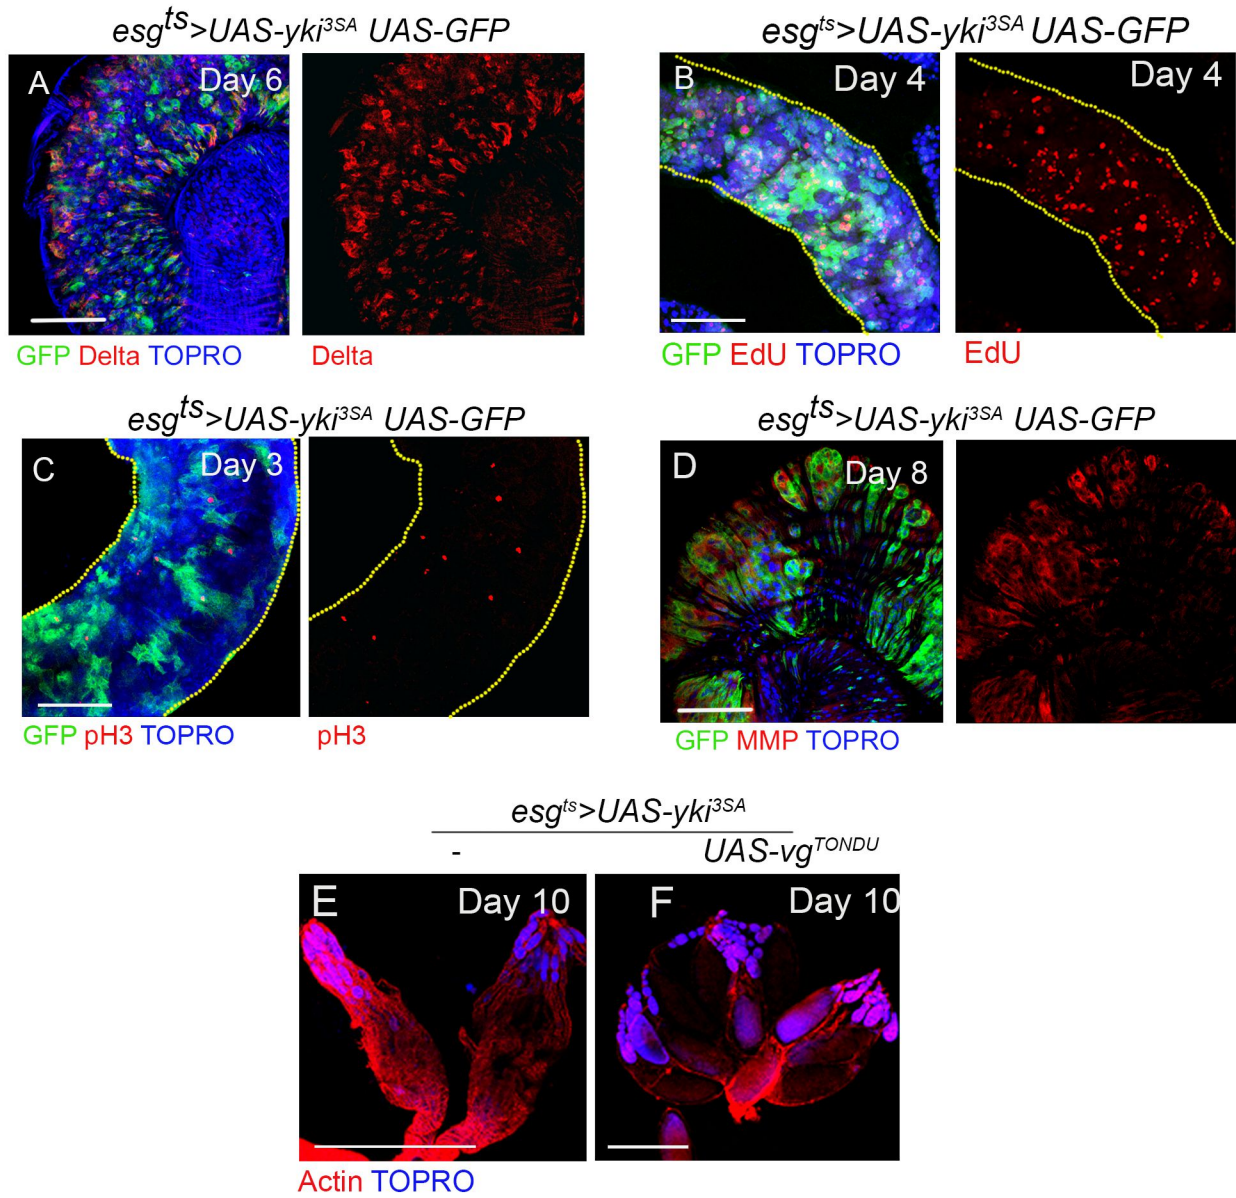

FIGURE S2

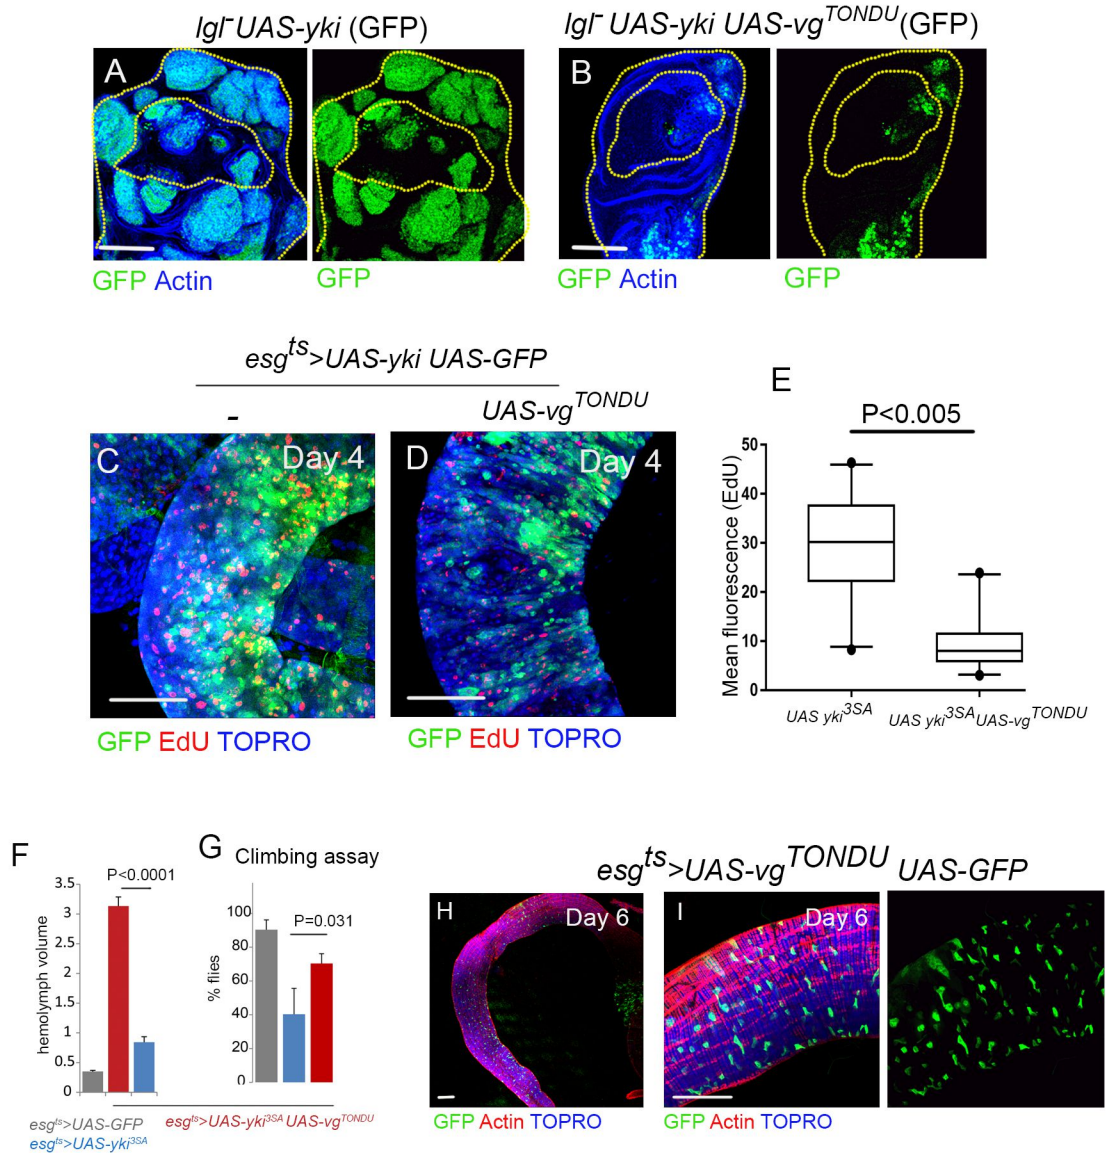

Figure S3

bioRxiv preprint doi: <https://doi.org/10.1101/2020.01.21.913806>; this version posted January 22, 2020. The copyright holder for this preprint (which was not certified by peer review) is the author/funder. All rights reserved. No reuse allowed without permission.

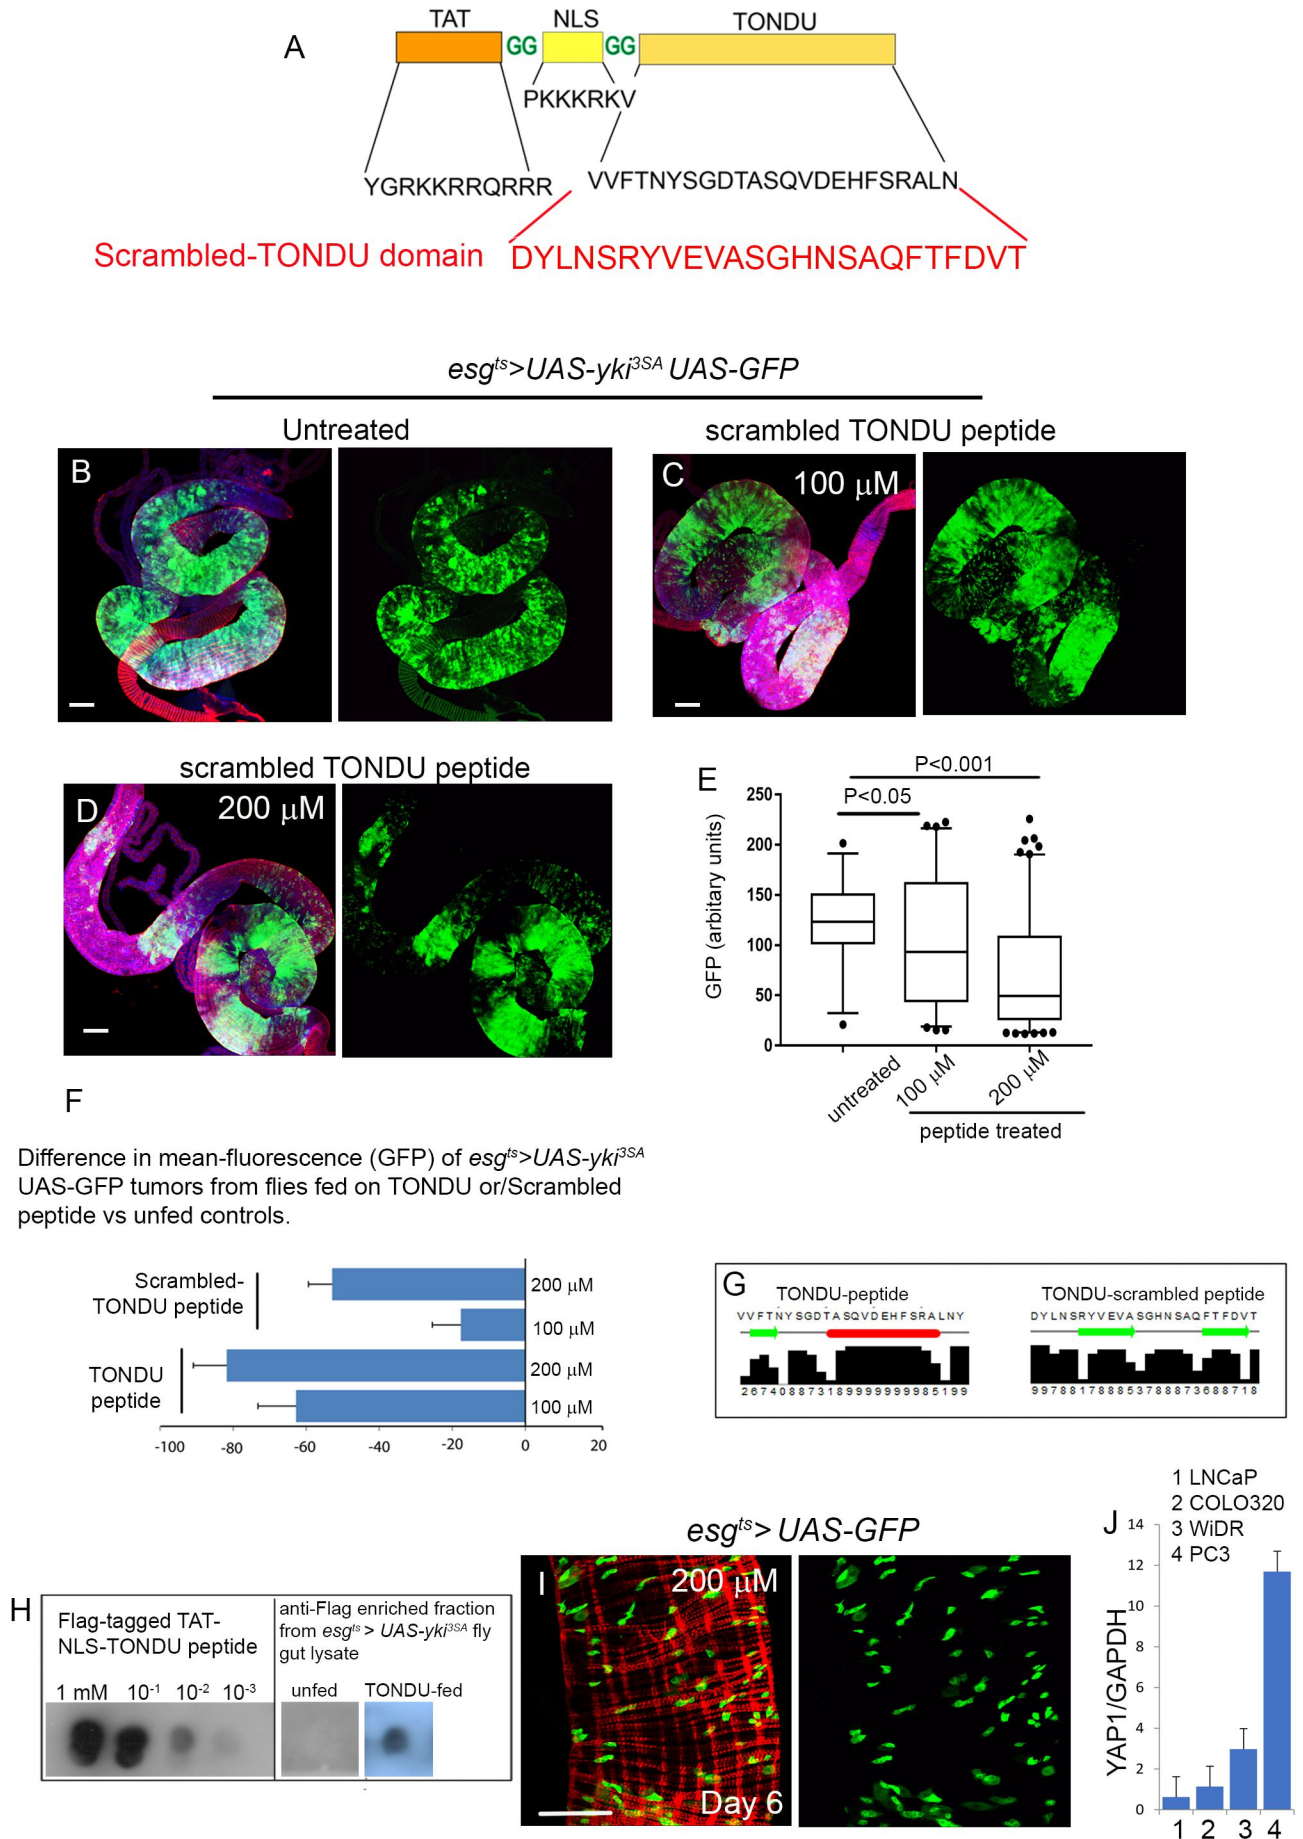



## Figure S4

### X-Y correlation plot

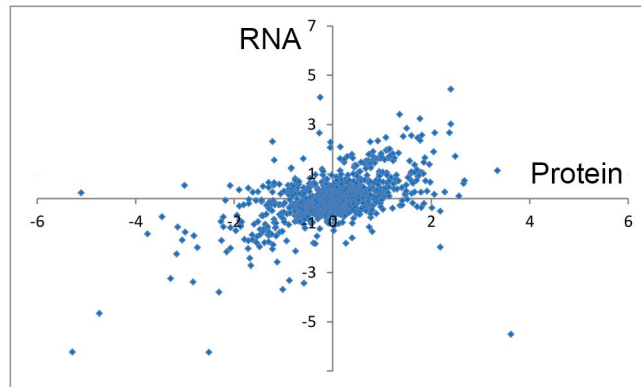

| Z-score | Protein | RNA   |
|---------|---------|-------|
| Protein | 1       | 0.548 |
| RNA     | 0.548   | 1     |

Figure S5

*esg Gal4<sup>ts</sup> > UAS-torso<sup>D/βCyt</sup> UAS-GFP*

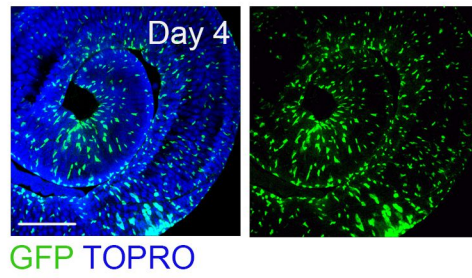

Source: https://www.biorxiv.org/content/10.1101/2020.01.21.913806v1.full.pdf
