# Supplementary material for: A Drosophila model of oral peptide therapeutics for adult Intestinal Stem Cell tumors
Source: bioRxiv or medRxiv preprint supplement (doi:10.1101/2020.01.21.913806), 2020-01-22
Supplement: Supplementary file [file media-1.pdf]

## SUPPLEMENTARY INFORMATION

**Table S1:** Protein abundance in *esg<sup>ts</sup>>yki<sup>3SA</sup>* driven ISC tumors on day 7 and day 1 of tumor induction. (Provided as an excel sheet).

**Table S2:** Proteins with significant fold change ( $\geq \log_2 2$ ,  $p < 0.05$ ) in day 7 versus day 1 of *esg<sup>ts</sup>>yki<sup>3SA</sup>* driven ISC tumors.

**Table S3:** Interacting partners belonging to the Hippo pathway for proteins with  $\geq \log_2 2$  fold change in *esg<sup>ts</sup>>yki<sup>3SA</sup>* driven ISC tumors.

**Table S4:** Gene Ontology (GO) analysis of enriched proteins in *esg<sup>ts</sup>>yki<sup>3SA</sup>* driven ISC tumors.

**Table S5:** Status of integrin pathway members in *esg<sup>ts</sup>>yki<sup>3SA</sup>* driven ISC tumors.

**Table S6:** Putative Yki-Sd binding sites in regulatory regions of genes with  $> \log_2 2$  fold change in protein levels *esg<sup>ts</sup>>yki<sup>3SA</sup>* driven ISC tumors.

**Table S7:** Fold change in protein levels in TONDU peptide-treated *esg<sup>ts</sup>>yki<sup>3SA</sup>* driven ISC tumors.

**Table S2:** Proteins with significant fold change ( $\geq \log_2 2$ ,  $p < 0.05$ ) in day 7 versus day 1 of *esg<sup>ts</sup>>yki<sup>3SA</sup>* driven ISC tumors.

| Gene ID     | Gene Symbol                 | Protein FDR Confidence : Combined | Master                   | UniProt Accession | Median (Day 1) | Median (Day 7) | Abundance Ratio: Day 7/Day 1 | Abundance Ratio (log2) | T-Test (P value) | # amino acids | MW [kDa] | # Peptides (Sequester HT) | Chromosome | Found in Sample Group: (Day 1) | Found in Sample Group: (Day 7) |
|-------------|-----------------------------|-----------------------------------|--------------------------|-------------------|----------------|----------------|------------------------------|------------------------|------------------|---------------|----------|---------------------------|------------|--------------------------------|--------------------------------|
| FBgn0261276 | <i>Opa1</i>                 | High                              | None                     | F0JAH2            | 74046.703      | 297394.711     | 4.016                        | 2.006                  | 0.0048           | 453           | 51.2     | 2                         | 2R         | Peak Found                     | High                           |
| FBgn0000562 | <i>egl</i>                  | Medium                            | Master Protein Candidate | Q9W1K4            | 14056.321      | 57460.557      | 4.088                        | 2.031                  | 0.0430           | 1004          | 112.1    | 1                         | 2R         | Peak Found                     | High                           |
| FBgn0260442 | <i>rhea</i>                 | High                              | Master Protein           | Q960C2            | 67243.947      | 276212.477     | 4.108                        | 2.038                  | 0.0264           | 1601          | 171.2    | 26                        | 3L         | High                           | High                           |
| FBgn0035498 | <i>Fit1</i>                 | High                              | Master Protein           | Q9VZ13            | 394737.461     | 1640060.666    | 4.155                        | 2.055                  | 0.0276           | 708           | 80.4     | 6                         | 3L         | High                           | High                           |
| FBgn0035793 | <i>CG7546</i>               | High                              | Master Protein Candidate | M9PBU3            | 91147.313      | 390343.234     | 4.283                        | 2.098                  | 0.0087           | 1179          | 125.7    | 2                         | 3L         | High                           | High                           |
| FBgn0030955 | <i>CG6891</i>               | High                              | Master Protein Candidate | Q8MQZ6            | 100332.746     | 448638.875     | 4.472                        | 2.161                  | 0.0323           | 269           | 30.2     | 1                         | X          | High                           | High                           |
| FBgn0013437 | <i>copia</i>                | High                              | Master Protein           | P04146            | 581703.875     | 2664281.188    | 4.580                        | 2.195                  | 0.0138           | 1409          | 162.7    | 3                         |            | High                           | High                           |
| FBgn0265991 | <i>Zasp52</i>               | High                              | None                     | G3JX29            | 147506.977     | 678663.543     | 4.601                        | 2.202                  | 0.0366           | 651           | 70.9     | 3                         | 2R         | High                           | High                           |
| FBgn0015379 | <i>dod</i>                  | High                              | Master Protein           | P54353            | 10240.124      | 94620.563      | 9.240                        | 3.208                  | 0.0451           | 166           | 18.4     | 1                         | X          | Peak Found                     | High                           |
| FBgn0000667 | <i>Actn</i>                 | High                              | Master Protein Candidate | M9MS06            | 60172.696      | 284884.955     | 4.734                        | 2.243                  | 0.0489           | 895           | 103.8    | 4                         | X          | Peak Found                     | High                           |
| FBgn0010434 | <i>cora</i>                 | High                              | Master Protein Candidate | AOA0B4 LFX4       | 469318.387     | 2248560.410    | 4.791                        | 2.260                  | 0.0047           | 1600          | 173.8    | 6                         | 2R         | High                           | High                           |
| FBgn0014020 | <i>Rho1</i>                 | High                              | Master Protein           | P48148            | 491985.963     | 2396139.059    | 4.870                        | 2.284                  | 0.0177           | 192           | 21.7     | 6                         | 2R         | Peak Found                     | High                           |
| FBgn0030052 | <i>CG12065</i>              | High                              | None                     | Q8MRM6            | 279747.601     | 1375997.625    | 4.919                        | 2.298                  | 0.0460           | 641           | 71.1     | 5                         | X          | Peak Found                     | High                           |
| FBgn0053470 | <i>CG33470; IM10; IMPPP</i> | High                              | Master Protein           | Q8ML70            | 3874.029       | 38433.805      | 9.921                        | 3.310                  | 0.0377           | 257           | 28       | 1                         | 2R         | Peak Found                     | High                           |
| FBgn0035499 | <i>Chd64</i>                | High                              | None                     | M9PE30            | 6518473.696    | 32604473.558   | 5.002                        | 2.322                  | 0.0003           | 175           | 19.4     | 25                        | 3L         | High                           | High                           |
| FBgn0025352 | <i>Mtpβ</i>                 | High                              | Master Protein           | O77466            | 60337.865      | 605581.250     | 10.037                       | 3.327                  | 0.0340           | 469           | 50.6     | 1                         | 2R         | Peak Found                     | High                           |
| FBgn0086346 | <i>ALIX</i>                 | High                              | Master Protein           | Q9VB05            | 77987.759      | 397127.230     | 5.092                        | 2.348                  | 0.0169           | 836           | 92.5     | 2                         | 3R         | Peak Found                     | High                           |
| FBgn0260442 | <i>rhea</i>                 | High                              | None                     | M9NDM3            | 1072195.987    | 5647432.310    | 5.267                        | 2.397                  | 0.0350           | 2169          | 235.1    | 31                        | 3L         | High                           | High                           |
| FBgn0004397 | <i>Vinc</i>                 | High                              | Master Protein           | X2JAB9            | 741152.635     | 3905646.674    | 5.270                        | 2.398                  | 0.0224           | 961           | 106.2    | 12                        | X          | High                           | High                           |
| FBgn0021760 | <i>chb</i>                  | High                              | Master Protein           | Q9NBD7            | 31028.359      | 169383.656     | 5.459                        | 2.449                  | 0.0329           | 1491          | 165.5    | 2                         | 3L         | Peak Found                     | High                           |
| FBgn0262567 | <i>CG43107</i>              | High                              | Master Protein           | D0IQC0            | 9607.135       | 107383.602     | 11.177                       | 3.483                  | 0.0174           | 63            | 6.8      | 1                         | 2R         | Peak Found                     | Peak Found                     |
| FBgn0013733 | <i>shot</i>                 | High                              | Master Protein           | A1Z9J3            | 28039.734      | 350253.043     | 12.491                       | 3.643                  | 0.0138           | 8805          | 988.9    | 2                         | 2R         | Peak Found                     | High                           |
| FBgn0033446 | <i>CG1648</i>               | High                              | Master Protein           | Q7K2P3            | 775279.577     | 5030252.721    | 6.488                        | 2.698                  | 0.0201           | 230           | 23.8     | 18                        | 2R         | High                           | High                           |
| FBgn0262735 | <i>Imp</i>                  | High                              | Master Protein           | Q0KHU2            | 88808.606      | 580638.375     | 6.538                        | 2.709                  | 0.0201           | 631           | 69.4     | 3                         | X          | Peak Found                     | High                           |
| FBgn0022709 | <i>Adk1</i>                 | High                              | Master Protein Candidate | Q9VTV3            | 17311.554      | 113919.848     | 6.581                        | 2.718                  | 0.0072           | 201           | 21.9     | 1                         | 3L         | Peak Found                     | High                           |
| FBgn0086906 | <i>sis</i>                  | High                              | None                     | R4UAY6            | 23315.416      | 308855.279     | 13.247                       | 3.728                  | 0.0122           | 662           | 74.6     | 2                         | 3L         | High                           | High                           |
| FBgn0010909 | <i>msn</i>                  | Medium                            | None                     | Q7KV90            | 7461.706       | 102635.387     | 13.755                       | 3.782                  | 0.0121           | 1200          | 130.3    | 1                         | 3L         | Peak Found                     | High                           |

Peptide therapy for tumor suppression in *Drosophila*

|             |                          |        |                          |            |             |              |        |               |               |      |       |    |    |            |            |
|-------------|--------------------------|--------|--------------------------|------------|-------------|--------------|--------|---------------|---------------|------|-------|----|----|------------|------------|
| FBgn0036580 | <i>PDCD-5</i>            | High   | Master Protein           | Q9VUZ8     | 11643.499   | 169815.949   | 14.585 | <b>3.866</b>  | <b>0.0111</b> | 133  | 15.1  | 2  | 3L | Peak Found | Peak Found |
| FBgn0051901 | <i>Mur29B</i>            | Medium | Master Protein Candidate | Q8MS63     | 22220.121   | 166646.781   | 7.500  | <b>2.907</b>  | <b>0.0366</b> | 339  | 35.7  | 1  | 2L | High       | High       |
| FBgn0265434 | <i>zip</i>               | High   | None                     | A0A0B4JD95 | 3745790.734 | 28852286.631 | 7.703  | <b>2.945</b>  | <b>0.0010</b> | 1964 | 226.6 | 67 | 2R | High       | High       |
| FBgn0005666 | <i>bent</i>              | High   | None                     | O76281     | 284599.331  | 2219016.392  | 7.797  | <b>2.963</b>  | <b>0.0385</b> | 6658 | 743   | 15 | 4  | Peak Found | High       |
| FBgn0262716 | <i>Arp3; Arp66B</i>      | High   | Master Protein           | P32392     | 91762.304   | 725246.529   | 7.904  | <b>2.982</b>  | <b>0.0397</b> | 418  | 47    | 4  | 3L | High       | High       |
| FBgn0053113 | <i>Rtn1</i>              | High   | Master Protein Candidate | Q9VMV9     | 594076.854  | 5048772.010  | 8.499  | <b>3.087</b>  | <b>0.0238</b> | 595  | 63.9  | 9  | 2L | High       | High       |
| FBgn0085282 | <i>CG34253</i>           | High   | Master Protein           | A8JNV2     | 26812.808   | 228363.336   | 8.517  | <b>3.090</b>  | <b>0.0221</b> | 112  | 12.5  | 1  | 3L | Peak Found | High       |
| FBgn0265434 | <i>zip</i>               | High   | None                     | J7JVR0     | 1687952.657 | 14541350.003 | 8.615  | <b>3.107</b>  | <b>0.0003</b> | 1425 | 164.4 | 39 | 2R | High       | High       |
| FBgn0016726 | <i>RpL29</i>             | High   | Master Protein           | B7FNL1     | 732637.288  | 6371885.220  | 8.697  | <b>3.121</b>  | <b>0.0452</b> | 85   | 10    | 6  | 2R | High       | High       |
| FBgn0029766 | <i>CG15784</i>           | High   | Master Protein           | Q9W4C1     | 151556.702  | 1363172.164  | 8.994  | <b>3.169</b>  | <b>0.0261</b> | 554  | 62.3  | 5  | X  | High       | High       |
| FBgn0038774 | <i>CG5023</i>            | High   | Master Protein           | Q9I7J0     | 580277.645  | 5744084.078  | 9.899  | <b>3.307</b>  | <b>0.0314</b> | 169  | 19.1  | 9  | 3R | High       | High       |
| FBgn0001217 | <i>Hsc70-2</i>           | High   | Master Protein           | P11146     | 34573.184   | 694860.797   | 20.098 | <b>4.329</b>  | <b>0.0135</b> | 633  | 69.7  | 3  | 3R | Peak Found | High       |
| FBgn0051363 | <i>CG31363</i>           | High   | Master Protein           | B5RJ67     | 30460.900   | 612434.938   | 20.106 | <b>4.330</b>  | <b>0.0112</b> | 230  | 24.4  | 1  | 3R | Peak Found | High       |
| FBgn0000043 | <i>Act42A</i>            | High   | Master Protein           | P02572     | 13317.133   | 326000.129   | 24.480 | <b>4.614</b>  | <b>0.0155</b> | 376  | 41.8  | 37 | 2R | Peak Found | High       |
| FBgn0004227 | <i>nonA</i>              | High   | Master Protein           | Q8IR16     | 51621.380   | 664389.951   | 12.870 | <b>3.686</b>  | <b>0.0092</b> | 742  | 81.9  | 5  | X  | High       | High       |
| FBgn0011225 | <i>jar</i>               | High   | Master Protein           | Q01989     | 32407.746   | 421589.398   | 13.009 | <b>3.701</b>  | <b>0.0170</b> | 1253 | 143.2 | 6  | 3R | Peak Found | High       |
| FBgn0034709 | <i>CG3074; Swim</i>      | High   | Master Protein           | Q7JWQ7     | 582800.990  | 7699009.721  | 13.210 | <b>3.724</b>  | <b>0.0014</b> | 431  | 48.8  | 11 | 2R | High       | High       |
| FBgn0031436 | <i>CG3214; ND-B17.2</i>  | High   | Master Protein           | Q9VQD7     | 13005.392   | 404752.090   | 31.122 | <b>4.960</b>  | <b>0.0032</b> | 142  | 16.8  | 2  | 2L | High       | High       |
|             |                          |        |                          |            |             |              |        |               |               |      |       |    |    |            |            |
|             |                          |        |                          |            |             |              |        |               |               |      |       |    |    |            |            |
| FBgn0000639 | <i>Fbp1</i>              | High   | Master Protein Candidate | M9PFK6     | 2941545.182 | 75592.226    | 0.026  | <b>-5.282</b> | <b>0.0184</b> | 1027 | 119.4 | 15 | 3L | High       | Peak Found |
| FBgn0033297 | <i>Mal-A8</i>            | High   | Master Protein Candidate | H5V882     | 145483.008  | 4449.611     | 0.031  | <b>-5.031</b> | <b>0.0020</b> | 597  | 68.1  | 1  | 2R | High       | Peak Found |
| FBgn0010497 | <i>dmGlut; I(2)01810</i> | Medium | Master Protein Candidate | Q95R95     | 217644.070  | 7972.730     | 0.037  | <b>-4.771</b> | <b>0.0143</b> | 165  | 17.7  | 1  | 2L | High       | Peak Found |
| FBgn0004426 | <i>LysC</i>              | High   | None                     | P83971     | 1020142.977 | 101441.592   | 0.099  | <b>-3.330</b> | <b>0.0171</b> | 140  | 15.6  | 2  | 3L | High       | Peak Found |
| FBgn0031141 | <i>CG1304</i>            | High   | None                     | Q9VRD1     | 1379758.828 | 251684.488   | 0.182  | <b>-2.455</b> | <b>0.0240</b> | 260  | 27.8  | 1  | X  | High       | High       |
| FBgn0004427 | <i>LysD</i>              | High   | Master Protein Candidate | P83972     | 2366383.414 | 523926.295   | 0.221  | <b>-2.175</b> | <b>0.0126</b> | 140  | 15.6  | 3  | 3L | High       | High       |
| FBgn0004425 | <i>LysB</i>              | High   | Master Protein Candidate | Q08694     | 2366383.414 | 523926.295   | 0.221  | <b>-2.175</b> | <b>0.0126</b> | 140  | 15.6  | 3  | 3L | High       | High       |
| FBgn0004428 | <i>LysE</i>              | High   | Master Protein           | P37159     | 2366383.414 | 523926.295   | 0.221  | <b>-2.175</b> | <b>0.0126</b> | 140  | 15.5  | 3  | 3L | High       | High       |
| FBgn0034662 | <i>CG13492</i>           | High   | Master Protein           | Q8MLU9     | 1715613.215 | 393704.303   | 0.229  | <b>-2.124</b> | <b>0.0428</b> | 2979 | 321.1 | 12 | 2R | High       | High       |
| FBgn0040349 | <i>CG3699</i>            | High   | Master Protein Candidate | Q9U1L2     | 6207241.123 | 1490634.446  | 0.240  | <b>-2.058</b> | <b>0.0024</b> | 251  | 26    | 12 | X  | High       | High       |

**Table S3:** Interacting partners belonging to the Hippo pathway for proteins with  $\geq \log_2 2$  fold change in *esg<sup>ts</sup>>yki<sup>3SA</sup>* driven ISC tumors.

| Protein      | Fold change ( $\log_2$ fold) | T Test P value |            | Uniprot    | §Hippo protein-protein interaction network |       |
|--------------|------------------------------|----------------|------------|------------|--------------------------------------------|-------|
|              |                              |                |            |            | Protein-and-Hippo pathway member           | Score |
| Cora         | 2.2604                       | 0.0047         | High       | A0A0B4LFX4 | Cora $\leftrightarrow$ Ft                  | 1*    |
| Mtb- $\beta$ | 3.3272                       | 0.0340         | Peak Found | O77466     | Mtb- $\beta$ $\leftrightarrow$ Ft          | 0.99* |
| Msn          | 3.7819                       | 0.0121         | Peak Found | Q7KV90     | Msn $\leftrightarrow$ Ft                   | 1*    |
| nonA         | 3.6860                       | 0.0092         | High       | Q8IR16     | nonA $\leftrightarrow$ Ex                  | 0.82* |
| Jar          | 3.7014                       | 0.0170         | Peak Found | Q01989     | Jar $\leftrightarrow$ Wts                  | 0.89* |
| Talin        | 2.0383                       | 0.0264         | High       | Q960C2     | Talin $\leftrightarrow$ Yki                | 0.33  |
| Vinc         | 2.2184                       | 0.0188         | High       | Q24584     | Vinc $\leftrightarrow$ Ft                  | 0.36  |
| Chd64        | 2.3225                       | 0.0003         | High       | M9PE30     | Chd64 $\leftrightarrow$ Yki                | 0.01  |
| Mtb- $\beta$ | 3.3272                       | 0.0340         | Peak Found | O77466     | Mtb- $\beta$ $\leftrightarrow$ Wts         | 0.1   |
| Arp3         | 2.9825                       | 0.0397         | High       | P32392     | Arp3 $\leftrightarrow$ Wts                 | 0.21  |
| Rtnl1        | 3.0872                       | 0.0238         | High       | Q9VMV9     | Rtnl1 $\leftrightarrow$ Ft                 | 0.38  |
| nonA         | 3.6860                       | 0.0092         | High       | Q8IR16     | nonA $\leftrightarrow$ Wts                 | 0.28  |

§Kwon *et al.* (1). \*Statistically significant interactions

**Table S4:** Gene Ontology (GO) analysis of enriched proteins in *esg<sup>ts</sup>>yki<sup>3SA</sup>* driven ISC tumors.

| MOLECULAR FUNCTION        |   | § GO classes                                                | Gene Numbers | % representation | % representation |
|---------------------------|---|-------------------------------------------------------------|--------------|------------------|------------------|
|                           | 1 | binding (GO:0005488)                                        | 7            | 19.40%           | 29.20%           |
|                           | 2 | structural molecule activity (GO:0005198)                   | 6            | 16.70%           | 25.00%           |
|                           | 3 | molecular function regulator (GO:0098772)                   | 1            | 2.80%            | 4.20%            |
|                           | 4 | catalytic activity (GO:0003824)                             | 10           | 27.80%           | 41.70%           |
| <b>BIOLOGICAL PROCESS</b> |   |                                                             |              |                  |                  |
|                           | 1 | response to stimulus (GO:0050896)                           | 2            | 5.60%            | 7.40%            |
|                           | 2 | cellular process (GO:0009987)                               | 11           | 30.60%           | 40.70%           |
|                           | 3 | multicellular organismal process (GO:0032501)               | 1            | 2.80%            | 3.70%            |
|                           | 4 | metabolic process (GO:0008152)                              | 6            | 16.70%           | 22.20%           |
|                           | 5 | biological regulation (GO:0065007)                          | 2            | 5.60%            | 7.40%            |
|                           | 6 | localization (GO:0051179)                                   | 4            | 11.10%           | 14.80%           |
|                           | 7 | biological adhesion (GO:0022610)                            | 1            | 2.80%            | 3.70%            |
| <b>CELLULAR COMPONENT</b> |   |                                                             |              |                  |                  |
|                           | 1 | organelle (GO:0043226)                                      | 9            | 25.00%           | 45.00%           |
|                           | 2 | extracellular region (GO:0005576)                           | 1            | 2.80%            | 5.00%            |
|                           | 3 | cell (GO:0005623)                                           | 10           | 27.80%           | 50.00%           |
| <b>PROTEIN CLASSES</b>    |   |                                                             |              |                  |                  |
|                           | 1 | transmembrane receptor regulatory/adaptor protein (PC00226) | 1            | 2.80%            | 4.20%            |
|                           | 2 | hydrolase (PC00121)                                         | 5            | 13.90%           | 20.80%           |
|                           | 3 | cell junction protein (PC00070)                             | 1            | 2.80%            | 4.20%            |

Peptide therapy for tumor suppression in *Drosophila*

|                 |    |                                                                            |   |        |        |
|-----------------|----|----------------------------------------------------------------------------|---|--------|--------|
|                 | 4  | enzyme modulator (PC00095)                                                 | 6 | 16.70% | 25.00% |
|                 | 5  | nucleic acid binding (PC00171)                                             | 3 | 8.30%  | 12.50% |
|                 | 6  | transferase (PC00220)                                                      | 1 | 2.80%  | 4.20%  |
|                 | 7  | receptor (PC00197)                                                         | 1 | 2.80%  | 4.20%  |
|                 | 8  | cytoskeletal protein (PC00085)                                             | 5 | 13.90% | 20.80% |
|                 | 9  | structural protein (PC00211)                                               | 1 | 2.80%  | 4.20%  |
| <b>PATHWAYS</b> |    |                                                                            |   |        |        |
|                 | 1  | Gonadotropin-releasing hormone receptor pathway (P06664)                   | 1 | 2.80%  | 4.30%  |
|                 | 2  | Cadherin signaling pathway (P00012)                                        | 1 | 2.80%  | 4.30%  |
|                 | 3  | De novo purine biosynthesis (P02738)                                       | 1 | 2.80%  | 4.30%  |
|                 | 4  | Axon guidance mediated by Slit/Robo (P00008)                               | 1 | 2.80%  | 4.30%  |
|                 | 5  | Apoptosis signaling pathway (P00006)                                       | 1 | 2.80%  | 4.30%  |
|                 | 6  | Integrin signalling pathway (P00034)                                       | 5 | 13.90% | 21.70% |
|                 | 7  | Angiogenesis (P00005)                                                      | 1 | 2.80%  | 4.30%  |
|                 | 8  | Alzheimer disease-presenilin pathway (P00004)                              | 1 | 2.80%  | 4.30%  |
|                 | 9  | Inflammation mediated by chemokine and cytokine signaling pathway (P00031) | 2 | 5.60%  | 8.70%  |
|                 | 10 | Huntington disease (P00029)                                                | 1 | 2.80%  | 4.30%  |
|                 | 11 | Parkinson disease (P00049)                                                 | 1 | 2.80%  | 4.30%  |
|                 | 12 | Ras Pathway (P04393)                                                       | 1 | 2.80%  | 4.30%  |
|                 | 13 | Cytoskeletal regulation by Rho GTPase (P00016)                             | 3 | 8.30%  | 13.00% |
|                 | 14 | Nicotinic acetylcholine receptor signaling pathway (P00044)                | 3 | 8.30%  | 13.00% |

<sup>s</sup>GO enrichment was determined using PANTHER (<http://www.pantherdb.org/>).

**Table S5:** Status of integrin pathway members in *esg<sup>ts</sup>>yki<sup>3SA</sup>* driven ISC tumors.

| Gene ID                | Pathway member              | Fly base ID | Proteomics<br>(log <sub>2</sub> fold). Current study | <sup>s</sup> RNAseq<br>(log <sub>2</sub> fold) |
|------------------------|-----------------------------|-------------|------------------------------------------------------|------------------------------------------------|
| <i>scb/aPS3</i>        | Integrin receptor           | FBgn0003328 | 2.6069 (UP, P=0.270)                                 | 3.2797 (UP)                                    |
| <i>rhea</i>            | Adaptor                     | FBgn0260442 | 2.3970 (UP, P=0.035)                                 | 2.4646 (UP)                                    |
| <i>Ilk</i>             | Kinase and Scaffold protein | FBgn0028427 | 2.0724 (UP, P=0.056)                                 | 1.6871 (UP)                                    |
| <i>Pax</i>             | Scaffold protein            | FBgn0041789 | 6.0551 (UP, P=0.051)                                 | 1.6507 (UP)                                    |
| <i>Vinc</i>            | Scaffold protein            | FBgn0004397 | 2.3977 (UP, P=0.022)                                 | 2.8706 (UP)                                    |
| <i>vkg</i>             | Basemen Membrane            | FBgn0016075 | 1.8255 (UP, P=0.014)                                 | 2.5527 (UP)                                    |
| <i>Rho1</i>            | GTPase                      | FBgn0014020 | 2.2840 (UP, P=0.018)                                 | 2.3794 (UP)                                    |
| <i>Act42A</i>          | Cytoskeleton                | FBgn0000043 | 4.6013 (UP, P=0.1934)                                | 5.1188 (UP)                                    |
| <i>mew/alpha-PS1</i>   | Integrin receptor           | FBgn0004456 | not found                                            | 3.3184 (UP)                                    |
| <i>mys/betaPS1</i>     | Integrin receptor           | FBgn0004657 | not found                                            | 3.7469 (UP)                                    |
| <i>if/alphaPS2</i>     | Integrin receptor           | FBgn0001250 | not found                                            | 0.3507                                         |
| <i>Itgbn/Itgbetanu</i> | Integrin receptor           | FBgn0010395 | not found                                            | 0.1434                                         |
| <i>LanA</i>            | Ligand                      | FBgn0002526 | not found                                            | 3.0021 (UP)                                    |
| <i>wb/LanA1</i>        | Ligand                      | FBgn0261563 | not found                                            | 2.0211 (UP)                                    |
| <i>LanB1</i>           | Ligand                      | FBgn0261800 | not found                                            | 2.4286 (UP)                                    |

<sup>s</sup> Song *et al.* (2).

**Table S6:** Putative Yki-Sd binding sites in regulatory regions of genes with  $>\log_2$  fold change in protein levels  $esg^{ts}>yki^{3SA}$  driven ISC tumors.

| Fly base ID | Gene Symbol       | Fold enrichment in $esg^{ts}>yki^{3SA}$ tumors | Chromosome | <sup>§</sup> Yki-Sd binding site from TSS   |
|-------------|-------------------|------------------------------------------------|------------|---------------------------------------------|
| FBgn0261276 | <i>opa1</i>       | 2.0059                                         | 2R         | -690*                                       |
| FBgn0000562 | <i>egl</i>        | 2.0314                                         | 2R         | -9.5                                        |
| FBgn0035498 | <i>Fit1</i>       | 2.0548                                         | 3L         | -317                                        |
| FBgn0035793 | <i>CG7546</i>     | 2.0985                                         | 3L         | -533, 193                                   |
| FBgn0030955 | <i>CG6891</i>     | 2.1608                                         | X          | -682; -316; 456                             |
| FBgn0015379 | <i>dod</i>        | 3.2079                                         | X          | -29.5                                       |
| FBgn0000667 | <i>Actn</i>       | 2.2432                                         | X          | 233.5                                       |
| FBgn0010434 | <i>cora</i>       | 2.2604                                         | 2R         | 346.5                                       |
| FBgn0014020 | <i>Rho1</i>       | 2.2840                                         | 2R         | 22.5; 1058.5                                |
| FBgn0030052 | <i>CG12065</i>    | 2.2983                                         | X          | 87; 647.5                                   |
| FBgn0035499 | <i>Chd64</i>      | 2.3225                                         | 3L         | 57.5                                        |
| FBgn0025352 | <i>Mtpbeta</i>    | 3.3272                                         | 2R         | -129                                        |
| FBgn0021760 | <i>chb</i>        | 2.4486                                         | 3L         | -100; 92; 841                               |
| FBgn0013733 | <i>shot</i>       | 3.6429                                         | 2R         | 94; -421.5; -1118.5; 7211; 839; 503; -114.5 |
| FBgn0033446 | <i>CG1648</i>     | 2.6978                                         | 2R         | 1867                                        |
| FBgn0010909 | <i>msn</i>        | 3.7819                                         | 3L         | 446; -30.5                                  |
| FBgn0053113 | <i>Rtnl1</i>      | 3.0872                                         | 2L         | -599.5; -308.5; -1035.5; 90.5               |
| FBgn0016726 | <i>Rpl-29B</i>    | 3.1205                                         | 2R         | -77                                         |
| FBgn0000043 | <i>Act42A</i>     | 4.6135                                         | 2R         | -52; -365                                   |
| FBgn0011225 | <i>jar</i>        | 3.7014                                         | 3R         | -562.5                                      |
| FBgn0028427 | <i>ilk</i>        | 2.0724                                         | 3L         | -4.5                                        |
| FBgn0041789 | <i>Pax</i>        | 6.0551                                         | 2L         | -19                                         |
| FBgn0004397 | <i>vinc</i>       | 2.3977                                         | X          | 64.5; -614                                  |
| FBgn0004456 | <i>mew</i>        | not found                                      | X          | -185                                        |
| FBgn0004657 | <i>alphaPS2</i>   | not found                                      | X          | 630.5; 1586; 1995.5                         |
| FBgn0010395 | <i>ltgbeta nu</i> | not found                                      | 2L         | -110                                        |
| FBgn0002526 | <i>lanA</i>       | not found                                      | 3L         | -569.5; -1244                               |

<sup>§</sup>Nagaraj *et al.* (3).

**Table S7:** Change in levels of proteins in TONDU peptide-treated  $esg^{ts}>yki^{3SA}$  driven ISC tumors.

| Fly base ID | Gene symbol   | FDR confidence | UniProt Accession | TREATED          |                  |
|-------------|---------------|----------------|-------------------|------------------|------------------|
|             |               |                |                   | Abundance Ratio. | T-Test (p value) |
| FBgn0261276 | <i>opa1</i>   | High           | F0JAH2            | -0.9677          | 0.0612           |
| FBgn0000562 | <i>egl</i>    | Medium         | Q9W1K4            | Not found        | Not found        |
| FBgn0260442 | <i>rhea</i>   | High           | Q960C2            | -0.9850          | 0.6182           |
| FBgn0035498 | <i>Fit1</i>   | High           | Q9VZI3            | -1.3108          | 0.4323           |
| FBgn0035793 | <i>CG7546</i> | High           | M9PBU3            | -1.9655          | 0.0057           |
| FBgn0030955 | <i>CG6891</i> | High           | Q8MQZ6            | -2.5940          | 0.0034           |
| FBgn0013437 | <i>GIP</i>    | High           | P04146            | -2.1634          | 0.0034           |
| FBgn0265991 | <i>Zasp52</i> | High           | G3JX29            | -1.2146          | 0.1208           |
| FBgn0015379 | <i>dod</i>    | High           | P54353            | not found        | Not found        |
| FBgn0000667 | <i>Actn</i>   | High           | M9MS06            | -1.3641          | 0.0427           |
| FBgn0010434 | <i>cora</i>   | High           | A0A0B4LFX4        | -1.0595          | 0.0051           |
| FBgn0014020 | <i>Rho1</i>   | High           | P48148            | -0.8551          | 0.0536           |

|             |                      |        |            |           |           |
|-------------|----------------------|--------|------------|-----------|-----------|
| FBgn0030052 | CG12065              | High   | Q8MRM6     | -1.5401   | 0.0876    |
| FBgn0053470 | CG33470; IM10; IMPPP | High   | Q8ML70     | -0.7563   | 0.4986    |
| FBgn0035499 | Chd64                | High   | M9PE30     | -1.2033   | 0.0076    |
| FBgn0025352 | Mtpbeta              | High   | O77466     | -2.3300   | 0.0139    |
| FBgn0086346 | ALIX                 | High   | Q9VB05     | -2.3246   | 0.0151    |
| FBgn0260442 | rhea                 | High   | M9NDM3     | -1.2592   | 0.0478    |
| FBgn0004397 | Vinc                 | High   | X2JAB9     | -1.3361   | 0.0365    |
| FBgn0021760 | chb                  | High   | Q9NBD7     | -2.1663   | 0.0263    |
| FBgn0262567 | CG43107              | High   | D0IQC0     | -1.6068   | 0.1094    |
| FBgn0013733 | shot                 | High   | A1Z9J3     | not found | Not found |
| FBgn0033446 | CG1648               | High   | Q7K2P3     | -1.2957   | 0.0316    |
| FBgn0262735 | Imp                  | High   | Q0KHU2     | -1.6114   | 0.0313    |
| FBgn0022709 | Adk1                 | High   | Q9VTV3     | -1.5700   | 0.0068    |
| FBgn0086906 | sls                  | High   | R4UAY6     | -1.2668   | 0.0439    |
| FBgn0010909 | msn                  | Medium | Q7KV90     | -0.9091   | 0.0273    |
| FBgn0036580 | PDCD-5               | High   | Q9VUZ8     | -1.1028   | 0.3096    |
| FBgn0051901 | Mur29B               | Medium | Q8MS63     | -1.0776   | 0.0244    |
| FBgn0265434 | zip                  | High   | A0A0B4JD95 | -1.1648   | 0.0140    |
| FBgn0005666 | bt                   | High   | O76281     | -2.5538   | 0.0038    |
| FBgn0262716 | Arp3; Arp66B         | High   | P32392     | -1.1503   | 0.0234    |
| FBgn0053113 | Rtnl1                | High   | Q9VMV9     | -1.2851   | 0.0129    |
| FBgn0085282 | CG34253              | High   | A8JNV2     | -0.4406   | 0.0846    |
| FBgn0265434 | zip-RC               | High   | J7JVR0     | -1.1466   | 0.0063    |
| FBgn0016726 | Rpl-29B              | High   | B7FNL1     | -1.8229   | 0.1047    |
| FBgn0029766 | CG15784              | High   | Q9W4C1     | -2.6531   | 0.0395    |
| FBgn0038774 | CG5023               | High   | Q9I7J0     | -1.3464   | 0.0059    |
| FBgn0001217 | Hsc70-2              | High   | P11146     | -1.5196   | 0.0343    |
| FBgn0051363 | Jupiter-RD           | High   | B5RJ67     | not found | not found |
| FBgn0000043 | Act42A               | High   | P02572     | -3.6540   | 0.0297    |
| FBgn0004227 | nonA                 | High   | Q8IR16     | -0.8528   | 0.0079    |
| FBgn0011225 | jar                  | High   | Q01989     | -0.3926   | 0.4731    |
| FBgn0034709 | CG3074; Swim         | High   | Q7JWQ7     | -1.6677   | 0.0054    |
| FBgn0031436 | CG3214; ND-B17.2     | High   | Q9VQD7     | -0.3077   | 0.4512    |

## REFERENCES

1. Kwon Y, *et al.* (2013) The Hippo signaling pathway interactome. *Science* 342(6159):737-740.
2. Song W, *et al.* (2019) Tumor-Derived Ligands Trigger Tumor Growth and Host Wasting via Differential MEK Activation. *Dev Cell* 48(2):277-286 e276.
3. Nagaraj R, *et al.* (2012) Control of mitochondrial structure and function by the Yorkie/YAP oncogenic pathway. *Genes Dev* 26(18):2027-2037.
